# Supplementary material for: Enantioselective synthesis of fluorinated branched allylic compounds via Ir-catalyzed allylations of functionalized fluorinated methylene derivatives
Source: Royal Society of Chemistry journal article supplement (doi:10.1039/c6ob01246a), 2016-01-01
Supplement: c6ob01246a1.pdf [file c6ob01246a1.pdf]

# Supporting Information

## Enantioselective synthesis of fluorinated branched allylic compounds via Ir-catalyzed allylations of functionalized fluorinated methylene derivatives

Hongbo Zhang, Jiteng Chen, Xiao-Ming Zhao\*

*Shanghai Key Lab of Chemical Assessment and Sustainability, Department of Chemistry, Tongji University, Tongji University, 1239 Siping Lu, Shanghai, P. R. China, 200092*

*xmzhao08@mail.tongji.edu.cn*

### Contents

#### General Experimental Details

All manipulations were carried out under an argon atmosphere using standard Schlenk techniques. All glassware was oven or flame dried immediately prior to use. All solvents were purified and dried according to standard methods prior to use, unless stated otherwise.

All reagents were obtained from commercial sources and used without further purification. <sup>1</sup>H NMR spectra were obtained at 400 MHz and recorded relative to the tetramethylsilane signal (0 ppm) or residual protio-solvent (7.26 ppm for CDCl<sub>3</sub>). <sup>13</sup>C NMR spectra were obtained at 100 MHz, and chemical shifts were recorded relative to the solvent resonance (CDCl<sub>3</sub>, 77.0 ppm). <sup>19</sup>F NMR spectra were obtained at 377 MHz. Data for NMR are recorded as follows: chemical shift (δ, ppm), multiplicity (s = singlet, d = doublet, t = triplet, m = multiplet or unresolved, br = broad singlet, coupling constant(s) in Hz, integration).

The phosphoramidite ligands<sup>[1]</sup>, substituted allylic carbonates were prepared according to the known procedures.

#### General procedure for Ir-catalyzed allylations of dimethyl 2-fluoromalonate (2a)

In a reaction tube equipped with a magnetic stirring bar were added in sequence allylic carbonate **1** (0.20 mmol, 1 equiv.) and a mixture of THF (2.0 mL) at room temperature under argon. To this solution were sequentially added the catalyst<sup>[2]</sup> made from both [Ir(COD)Cl]<sub>2</sub> (0.004 mmol, 2 mol%) and phosphoramidite ligand **L1** (0.008 mmol, 4 mol%) and CsF (0.40 mmol, 2 equiv.) and dimethyl 2-fluoromalonate **2a** (0.40 mmol, 2 equiv.). The reaction was vigorously stirred at room temperature for the stated time. The reaction mixture was stirring until the allylic carbonate **1** was completely consumed. The crude residue was purified by

flash column chromatography (methanol/ethyl acetate) to give the desired products **3**.

**References:**

- 1 (a) D. J. Cram, R. C. Helgeson, S. C. Peacock, L. J. Kaplan, L. A. Domeier, P. Moreau, K. Koga, J. M. Mayer, Y. Chao, M. G. Siegel, D. H. Hoffman and G. D. Y. Sogah, *J. Org. Chem.* 1978, **43**, 1930. (b) L. A. Arnold, R. Imbos, A. Mandoli, A. H. M. de Vries, R. Naasz and B. L. Feringa, *Tetrahedron* 2000, **56**, 2865.
- 2 C. A. Kiener, C. Shu, C. Incarvito and J. F. Hartwig, *J. Am. Chem. Soc.* 2003, **125**, 14272.

## Characterization Data

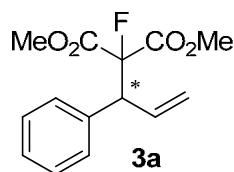

### Dimethyl-2-fluoro-2-(1-phenylallyl)malonate (**3a**)

Yield: 89% (23.7 mg); *ee*: 92%; colorless oil.

$^1\text{H}$  NMR (400 MHz,  $\text{CDCl}_3$ )  $\delta$  = 7.46 – 7.25 (m, 5H), 6.17 (dt,  $J$  = 17.2, 9.6 Hz, 1H), 5.39 – 5.13 (m, 2H), 4.41 (dd,  $J$  = 31.8, 8.9 Hz, 1H), 3.91 (s, 3H), 3.63 (s, 3H) ppm.

$^{19}\text{F}$  NMR (376 MHz,  $\text{CDCl}_3$ )  $\delta$  = -176.09 (s) ppm.

$^{13}\text{C}$  NMR (101 MHz,  $\text{CDCl}_3$ )  $\delta$  = 165.7 (d,  $J$  = 25.8 Hz), 165.2 (d,  $J$  = 26.0 Hz), 136.5 (s), 133.7 (d,  $J$  = 4.7 Hz), 129.1 (d,  $J$  = 2.2 Hz), 128.6 (s), 127.8 (s), 119.5 (s), 97.5 (d,  $J$  = 209.5 Hz), 54.6 (s), 54.4 (s), 53.4 (d,  $J$  = 34.1 Hz).

HRMS (ESI+) calcd for  $\text{C}_{14}\text{H}_{15}\text{NaO}_4$  [ $\text{M}+\text{Na}$ ] $^+$ : 289.0846, Found: 289.0847.

The *ee* of the product was determined by chiral HPLC [Daicel CHIRALCEL AD-H (0.46 cm x 25 cm); hexane/2-propanol = 98/2, flow rate = 1.0 mL/min; detection wavelength = 214 nm;  $t_{\text{R}}$  = 10.318 (major), 12.242 (minor) min].  $[\alpha]_{\text{D}}^{20}$  = +28.6° (c 1.0,  $\text{CH}_3\text{OH}$ ).

IR (KBr):  $\nu$  max ( $\text{cm}^{-1}$ ) = 3091, 3078, 2955, 2878, 1729, 1645, 1590, 1505, 1460, 1428, 1360, 1037, 920, 830, 665, 531.

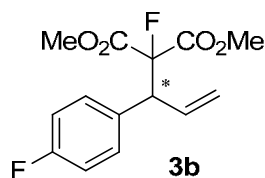

### Dimethyl-2-fluoro-2-(1-(4-fluorophenyl)allyl)malonate (**3b**)

Yield: 92% (26.2 mg); *ee*: 93%; colorless oil.

$^1\text{H}$  NMR (400 MHz,  $\text{CDCl}_3$ )  $\delta$  = 7.34 (dd,  $J$  = 7.5, 5.6 Hz, 2H), 7.04 (t,  $J$  = 8.6 Hz, 2H), 6.27 – 6.00 (m, 1H), 5.42 – 5.11 (m, 2H), 4.41 (dd,  $J$  = 31.6, 8.8 Hz, 1H), 3.90 (s, 3H), 3.65 (s, 3H) ppm.

$^{19}\text{F}$  NMR (376 MHz,  $\text{CDCl}_3$ )  $\delta$  = -114.37 (s), -176.51 (s) ppm

$^{13}\text{C}$  NMR (101 MHz,  $\text{CDCl}_3$ )  $\delta$  = 165.5 (d,  $J$  = 25.8 Hz), 165.1 (d,  $J$  = 25.8 Hz), 162.3 (d,  $J$  = 246.6 Hz), 133.5 (d,  $J$  = 4.6 Hz), 132.2 (d,  $J$  = 3.3 Hz), 130.8 (dd,  $J$  = 8.1, 2.4 Hz), 119.7 (s), 115.5 (d,  $J$  = 21.3 Hz), 97.4 (d,  $J$  = 209.4 Hz), 53.7 (s), 53.6 (s), 53.5 (d,  $J$  = 30.8 Hz).

HRMS (ESI+) calcd for  $\text{C}_{14}\text{H}_{14}\text{F}_2\text{NaO}_4$  [ $\text{M}+\text{Na}$ ] $^+$ : 307.0752, Found: 307.0754.

The *ee* of the product was determined by chiral HPLC [Daicel CHIRALCEL IC (0.46 cm x 25 cm); hexane/2-propanol = 98/2, flow rate = 1.0 mL/min; detection

wavelength = 214 nm;  $t_R$  = 15.782 (major), 17.421 (minor) min].  $[\alpha]_D^{20}$  = +13.9° (c 1.0, CH<sub>3</sub>OH).

IR (KBr):  $\nu$  max (cm<sup>-1</sup>) = 3096, 3074, 2932, 2895, 1733, 1647, 1598, 1515, 1473, 1479, 1369, 1037, 922, 833, 661, 528.

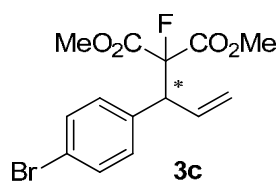

Dimethyl-2-(1-(4-bromophenyl)allyl)-2-fluoromalonate (**3c**)

Yield: 87% (39.8 mg); *ee*: 94%; colorless oil.

<sup>1</sup>H NMR (400 MHz, CDCl<sub>3</sub>)  $\delta$  = 7.50 (dd,  $J$  = 18.6, 8.4 Hz, 2H), 7.27 (dd,  $J$  = 22.6, 8.0 Hz, 2H), 6.42 – 5.85 (m, 1H), 5.58 – 4.80 (m, 2H), 4.38 (dd,  $J$  = 31.5, 8.8 Hz, 1H), 3.90 (s, 3H), 3.66 (s, 3H).

<sup>19</sup>F NMR (376 MHz, CDCl<sub>3</sub>)  $\delta$  = -176.19 (s).

<sup>13</sup>C NMR (101 MHz, CDCl<sub>3</sub>)  $\delta$  = 165.4 (d,  $J$  = 25.8 Hz), 165.1 (d,  $J$  = 25.8 Hz), 135.5 (s), 133.2 (d,  $J$  = 4.6 Hz), 131.8 (s), 130.9 (d,  $J$  = 2.4 Hz), 122.0 (s), 119.9 (s), 97.1 (d,  $J$  = 209.7 Hz), 53.9 (s), 53.7 (s), 53.5 (d,  $J$  = 26.2 Hz).

HRMS (ESI+) calcd for C<sub>14</sub>H<sub>14</sub>BrFNaO<sub>4</sub> [M+Na]<sup>+</sup>: 366.9952, Found:366.9926.

The *ee* of the product was determined by chiral HPLC [Daicel CHIRALCEL AD-H (0.46 cm x 25 cm); hexane/2-propanol = 98/2, flow rate = 1.0 mL/min; detection wavelength = 214 nm;  $t_R$  = 14.202 (major), 15.608 (minor) min].  $[\alpha]_D^{20}$  = +34.4° (c 1.0, CH<sub>3</sub>OH).

IR (KBr):  $\nu$  max (cm<sup>-1</sup>) = 3037, 2956, 2930, 2845, 1760, 1470, 1239, 1156, 1076, 1048, 1015, 966, 778, 565, 519.

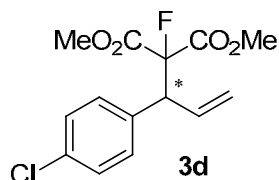

Dimethyl-2-(1-(4-chlorophenyl)allyl)-2-fluoromalonate (**3d**)

Yield: 92% (27.6 mg); *ee*: 99%; colorless oil.

<sup>1</sup>H NMR (400 MHz, CDCl<sub>3</sub>)  $\delta$  = 7.48 – 7.22 (m, 4H), 6.31 – 5.87 (m, 1H), 5.50 – 5.05 (m, 2H), 4.40 (dd,  $J$  = 31.5, 8.8 Hz, 1H), 3.90 (s, 3H), 3.66 (s, 3H).

<sup>19</sup>F NMR (376 MHz, CDCl<sub>3</sub>)  $\delta$  = -176.19 (s).

<sup>13</sup>C NMR (101 MHz, CDCl<sub>3</sub>)  $\delta$  = 165.5 (d,  $J$  = 25.8 Hz), 165.1 (d,  $J$  = 25.8 Hz), 135.0 (s), 133.8 (s), 133.2 (d,  $J$  = 4.6 Hz), 130.5 (d,  $J$  = 2.4 Hz), 128.8 (s), 119.9 (s), 97.2 (d,  $J$  = 209.5 Hz), 53.8 (s), 53.7 (s), 53.5 (d,  $J$  = 27.4 Hz).

HRMS (ESI+) calcd for C<sub>14</sub>H<sub>14</sub>ClFNaO<sub>4</sub> [M+Na]<sup>+</sup>: 323.0457, Found:323.0439.

The *ee* of the product was determined by chiral HPLC [Daicel CHIRALCEL AD-H (0.46 cm x 25 cm); hexane/2-propanol = 98/2, flow rate = 0.8 mL/min; detection wavelength = 214 nm;  $t_R$  = 19.145 (major), 21.535 (minor) min].  $[\alpha]_D^{20}$  = +37.1° (c 1.0, CH<sub>3</sub>OH).

IR (KBr):  $\nu$  max (cm<sup>-1</sup>) = 3025, 3007, 2977, 2945, 2862, 1759, 1685, 1489, 1252, 1089, 967, 833, 773, 511.

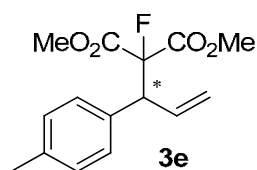

Dimethyl-2-fluoro-2-(1-(p-tolyl)allyl)malonate (**3e**)

Yield: 86% (24.1 mg); *ee*: 95%; colorless oil.

<sup>1</sup>H NMR (400 MHz, CDCl<sub>3</sub>)  $\delta$  = 7.30 – 7.05 (m, 4H), 6.33 – 5.97 (m, 1H), 5.25 (dd, *J* = 13.6, 7.2 Hz, 2H), 4.38 (dd, *J* = 31.8, 8.9 Hz, 1H), 3.88 (s, 3H), 3.64 (s, 3H), 2.36 (s, 3H).

<sup>19</sup>F NMR (376 MHz, CDCl<sub>3</sub>)  $\delta$  = -176.06 (s).

<sup>13</sup>C NMR (101 MHz, CDCl<sub>3</sub>)  $\delta$  165.8 (d, *J* = 25.8 Hz), 165.3 (d, *J* = 26.0 Hz), 137.5 (s), 133.9 (d, *J* = 4.7 Hz), 133.4 (s), 129.3 (s), 129.0 (d, *J* = 2.2 Hz), 119.2 (s), 97.5 (d, *J* = 209.0 Hz), 54.2 (s), 54.1 (s), 53.4 (d, *J* = 30.5 Hz), 21.1 (s).

HRMS (ESI<sup>+</sup>) calcd for C<sub>15</sub>H<sub>17</sub>FNao<sub>4</sub> [M+Na]<sup>+</sup>: 303.1003, Found:303.1001.

The *ee* of the product was determined by chiral HPLC [Daicel CHIRALCEL IC (0.46 cm x 25 cm); hexane/2-propanol = 98/2, flow rate = 1.0 mL/min; detection wavelength = 214 nm; *t*<sub>R</sub> = 24.305 (major), 27.909 (minor) min]. [ $\alpha$ ]<sub>D</sub><sup>20</sup> = +38.8° (c 1.0, CH<sub>3</sub>OH).

IR (KBr):  $\nu$  max (cm<sup>-1</sup>) = 3093, 3069, 2948, 2883, 1732, 1650, 1589, 1511, 1463, 1458, 1363, 1052, 938, 833, 675, 527.

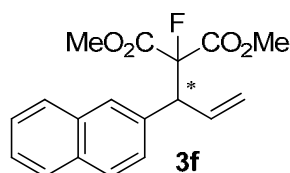

Dimethyl-2-fluoro-2-(1-(naphthalen-2-yl)allyl)malonate (**3f**)

Yield: 88% (27.8 mg); *ee*: 95%; colorless oil.

<sup>1</sup>H NMR (400 MHz, CDCl<sub>3</sub>)  $\delta$  = 7.84 (d, *J* = 6.0 Hz, 4H), 7.62 – 7.36 (m, 3H), 6.28 (dt, *J* = 17.3, 9.5 Hz, 1H), 5.48 – 5.12 (m, 2H), 4.61 (dd, *J* = 31.7, 8.7 Hz, 1H), 3.92 (s, 3H), 3.59 (s, 3H) ppm.

<sup>19</sup>F NMR (376 MHz, CDCl<sub>3</sub>)  $\delta$  = -175.54 (s) ppm.

<sup>13</sup>C NMR (101 MHz, CDCl<sub>3</sub>)  $\delta$  = 165.7 (d, *J* = 25.8 Hz), 165.3 (d, *J* = 25.9 Hz), 134.1 (s), 133.7 (d, *J* = 4.6 Hz), 133.4 (s), 132.8 (s), 128.3 (s), 128.0 (s), 127.6 (s), 127.0 (d, *J* = 2.5 Hz), 126.2 (s), 119.7 (s), 97.6 (d, *J* = 209.5 Hz), 54.6 (s), 54.5 (s), 53.4 (d, *J* = 34.4 Hz).

HRMS (ESI<sup>+</sup>) calcd for C<sub>18</sub>H<sub>17</sub>FNao<sub>4</sub> [M+Na]<sup>+</sup>: 339.1003, Found: 339.0979.

The *ee* of the product was determined by chiral HPLC [Daicel CHIRALCEL IC (0.46 cm x 25 cm); hexane/2-propanol = 98/2, flow rate = 1.0 mL/min; detection wavelength = 214 nm; *t*<sub>R</sub> = 24.202 (major), 27.438 (minor) min]. [ $\alpha$ ]<sub>D</sub><sup>20</sup> = +40.5° (c 1.0, CH<sub>3</sub>OH).

IR (KBr):  $\nu$  max (cm<sup>-1</sup>) = 3016, 2970, 2933, 2838, 1735, 1643, 1256, 1247, 1160, 769.

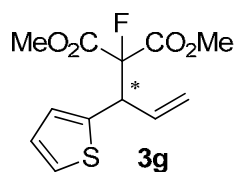

Dimethyl-2-fluoro-2-(1-(thiophen-2-yl)allyl)malonate (**3g**)

Yield: 94% (25.6 mg); *ee*: 97%; colorless oil.

<sup>1</sup>H NMR (400 MHz, CDCl<sub>3</sub>)  $\delta$  = 7.32 – 7.17 (m, 1H), 7.08 – 6.84 (m, 2H), 6.17 – 5.94 (m, 1H), 5.26 (t, *J* = 14.2 Hz, 2H), 4.70 (dd, *J* = 30.2, 9.0 Hz, 1H), 3.85 (s, 3H), 3.70 (s, 3H).

<sup>19</sup>F NMR (376 MHz, CDCl<sub>3</sub>)  $\delta$  = -175.11 (s).

<sup>13</sup>C NMR (101 MHz, CDCl<sub>3</sub>)  $\delta$  = 165.3 (d, *J* = 22.4 Hz), 165.0 (d, *J* = 22.4 Hz), 137.8 (s), 133.3 (d, *J* = 4.4 Hz), 126.9 (s), 126.8 (d, *J* = 1.5 Hz), 125.5 (s), 119.8 (s), 97.0 (d, *J* = 209.2 Hz), 53.6 (s), 53.5 (s), 49.9 (d, *J* = 19.6 Hz).

HRMS (ESI<sup>+</sup>) calcd for C<sub>12</sub>H<sub>13</sub>FSNaO<sub>4</sub> [M+Na]<sup>+</sup>: 295.0411, Found: 295.0407.

The *ee* of the product was determined by chiral HPLC [Daicel CHIRALCEL AD-H (0.46 cm x 25 cm); hexane/2-propanol = 98/2, flow rate = 1.0 mL/min; detection wavelength = 214 nm; *t*<sub>R</sub> = 12.521 (major), 14.851 (minor) min]. [ $\alpha$ ]<sub>D</sub><sup>20</sup> = +12.07° (c 1.0, CH<sub>3</sub>OH).

IR (KBr):  $\nu$  max (cm<sup>-1</sup>) = 3025, 2983, 2945, 2843, 1851, 1607, 1238, 1065, 936, 800, 742, 708.

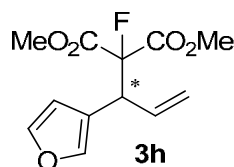

Dimethyl-2-fluoro-2-(1-(furan-3-yl)allyl)malonate (**3h**)

Yield: 93% (23.8 mg); *ee*: -97%; colorless oil.

<sup>1</sup>H NMR (400 MHz, CDCl<sub>3</sub>)  $\delta$  = 7.41 (d, *J* = 10.4 Hz, 2H), 6.41 (s, 1H), 6.10 – 5.87 (m, 1H), 5.27 (dd, *J* = 13.6, 7.0 Hz, 2H), 4.39 (dd, *J* = 31.2, 8.7 Hz, 1H), 3.88 (s, 3H), 3.76 (s, 3H).

<sup>19</sup>F NMR (376 MHz, CDCl<sub>3</sub>)  $\delta$  = -175.987 (s).

<sup>13</sup>C NMR (101 MHz, CDCl<sub>3</sub>)  $\delta$  = 165.5 (d, *J* = 8.2 Hz), 165.3 (d, *J* = 8.0 Hz), 143.1 (s), 140.6 (d, *J* = 2.0 Hz), 133.1 (d, *J* = 3.9 Hz), 120.2 (s), 119.6 (s), 110.6 (d, *J* = 1.5 Hz), 97.2 (d, *J* = 208.4 Hz), 53.5 (s), 53.4 (s), 45.9 (d, *J* = 19.7 Hz).

HRMS (ESI<sup>+</sup>) calcd for C<sub>12</sub>H<sub>13</sub>FNaO<sub>5</sub> [M+Na]<sup>+</sup>: 279.0639, Found: 279.0633.

The *ee* of the product was determined by chiral HPLC [Daicel CHIRALCEL AD-H (0.46 cm x 25 cm); hexane/2-propanol = 98/2, flow rate = 0.5 mL/min; detection wavelength = 214 nm; *t*<sub>R</sub> = 21.623 (minor), 22.781 (major) min]. [ $\alpha$ ]<sub>D</sub><sup>20</sup> = +18.97° (c 1.0, CH<sub>3</sub>OH).

IR (KBr):  $\nu$  max (cm<sup>-1</sup>) = 3033, 2973, 2955, 2860, 1845, 1677, 1241, 1145, 940, 811, 747, 738.

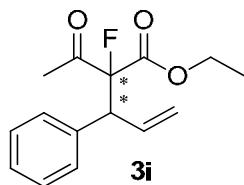

Ethyl 2-acetyl-2-fluoro-3-phenylpent-4-enoate (**3i**)

Yield: 93% (24.6 mg); colorless oil.

<sup>1</sup>H NMR (400 MHz, CDCl<sub>3</sub>)  $\delta$  = 7.41 – 7.24 (m, 10H), 6.25 – 6.11 (m, 1H), 6.11 – 5.95 (m, 0.89H), 5.27 (dd,  $J$  = 13.7, 6.8 Hz, 2H), 5.21 (dd,  $J$  = 13.6, 7.5 Hz, 1.83H), 4.51 – 4.42 (m, 1H), 4.38 (t,  $J$  = 6.1 Hz, 0.89H), 4.36 – 4.21 (m, 2H), 4.11 – 3.97 (m, 1.78H), 2.38 (d,  $J$  = 5.6 Hz, 2.72H), 1.93 (d,  $J$  = 5.6 Hz, 3H), 1.37 (t,  $J$  = 7.1 Hz, 3H), 1.04 (t,  $J$  = 7.1 Hz, 2.72H).

<sup>19</sup>F NMR (377 MHz, CDCl<sub>3</sub>)  $\delta$  = -174.87 (s), -175.47 (s).

<sup>13</sup>C NMR (101 MHz, CDCl<sub>3</sub>)  $\delta$  = 202.0 (d,  $J$  = 30.0 Hz), 201.6 (d,  $J$  = 29.6 Hz), 165.1 (d,  $J$  = 25.9 Hz), 164.6 (d,  $J$  = 26.1 Hz), 137.1 (s), 136.4 (s), 133.8 (d,  $J$  = 4.4 Hz), 133.8 (d,  $J$  = 5.4 Hz), 129.6 (d,  $J$  = 2.1 Hz), 129.0 (d,  $J$  = 2.5 Hz), 128.7 (s), 128.6 (s), 127.7 (s), 127.6 (s), 119.6 (s), 119.3 (s), 103.9 (d,  $J$  = 28.4 Hz), 101.9 (d,  $J$  = 29.9 Hz), 62.9 (s), 62.6 (s), 54.2 (d,  $J$  = 18.0 Hz), 54.1 (d,  $J$  = 18.1 Hz), 27.0 (s), 26.9 (s), 14.1 (s), 13.7 (s).

HRMS (ESI+) calcd for C<sub>15</sub>H<sub>17</sub>FNao<sub>3</sub> [M+Na]<sup>+</sup>: 287.1054, Found:287.1050.

$[\alpha]_D^{20}$  = +28.05° (c 1.0, CH<sub>3</sub>OH).

IR (KBr):  $\nu$  max (cm<sup>-1</sup>) = 3016, 2965, 2932, 2850, 1733, 1644, 1285, 1258, 1165, 887.

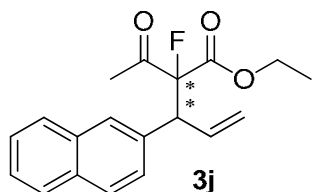

Ethyl 2-acetyl-2-fluoro-3-(naphthalen-2-yl)pent-4-enoate (**3j**)

Yield: 92% (28.9 mg); *ee*: 94%; colorless oil.

<sup>1</sup>H NMR (400 MHz, CDCl<sub>3</sub>)  $\delta$  = 7.78 (dd,  $J$  = 12.1, 9.3 Hz, 7.08H), 7.45 (t,  $J$  = 6.9 Hz, 5.2H), 6.33 – 6.15 (m, 1H), 6.15 – 5.99 (m, 0.8H), 5.27 (dd,  $J$  = 13.6, 8.5 Hz, 2H), 5.23 – 5.08 (m, 1.71H), 4.60 (dd,  $J$  = 8.5, 4.7 Hz, 0.88H), 4.52 (dd,  $J$  = 8.5, 4.9 Hz, 1H), 4.41 – 4.23 (m, 2H), 3.95 (qd,  $J$  = 7.1, 2.7 Hz, 1.63H), 2.38 (d,  $J$  = 5.7 Hz, 2.38H), 1.88 (d,  $J$  = 5.7 Hz, 3H), 1.35 (t,  $J$  = 7.1 Hz, 3H), 0.93 (t,  $J$  = 7.1 Hz, 2.56H).

<sup>19</sup>F NMR (376 MHz, CDCl<sub>3</sub>)  $\delta$  = -174.46 (s), -175.00 (s).

<sup>13</sup>C NMR (101 MHz, CDCl<sub>3</sub>)  $\delta$  = 201.9 (d,  $J$  = 30.0 Hz), 201.6 (d,  $J$  = 30.0 Hz), 165.1 (d,  $J$  = 25.9 Hz), 164.6 (d,  $J$  = 26.1 Hz), 134.6 (s), 133.91 (s), 133.8 (d,  $J$  = 4.2 Hz), 133.7 (d,  $J$  = 5.1 Hz), 133.3 (d,  $J$  = 3.2 Hz), 132.7 (d,  $J$  = 1.2 Hz), 128.8 (s), 128.3 (s), 128.3 (s), 128.0 (d,  $J$  = 4.2 Hz), 128.0 (d,  $J$  = 3.4 Hz), 127.6 (s), 127.2 (d,  $J$  = 2.7 Hz), 127.0 (d,  $J$  = 2.6 Hz), 126.0 (s), 126.2 (s), 126.2 (s), 126.1 (s), 119.9 (s), 119.5 (s).

104.1 (d,  $J = 23.4$  Hz), 102.0 (d,  $J = 26.1$  Hz), 63.0 (s), 62.6 (s), 54.3 (d,  $J = 11.0$  Hz), 54.1 (d,  $J = 11.0$  Hz), 27.1 (s), 27.0 (s), 14.2 (s), 13.8 (s).

HRMS (ESI+) calcd for  $C_{19}H_{19}FNaO_3$   $[M+Na]^+$ : 337.1210, Found:337.1212.

The *ee* of the product was determined by chiral HPLC [Daicel CHIRALCEL AD-H (0.46 cm x 25 cm); hexane/2-propanol = 98/2, flow rate = 0.5 mL/min; detection wavelength = 214 nm;  $t_R = 38.875$  (major), min 53.126 (minor)].  $[\alpha]_D^{20} = +58.46^\circ$  (c 1.0,  $CH_3OH$ ).

IR (KBr):  $\nu$  max (cm<sup>-1</sup>) = 3106, 2976, 2933, 2850, 1730, 1647, 1280, 1233, 1164, 755.

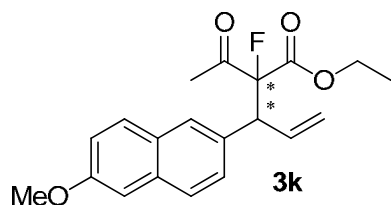

Ethyl 2-acetyl-2-fluoro-3-(6-methoxynaphthalen-2-yl)pent-4-enoate (**3k**)

Yield: 80% (27.5 mg); *ee*: 97%; colorless oil.

<sup>1</sup>H NMR (400 MHz,  $CDCl_3$ )  $\delta = 7.74$  (dd,  $J = 14.9, 6.3$  Hz, 2H), 7.46 (t,  $J = 9.1$  Hz, 1H), 7.24 – 7.07 (m, 1H), 6.34 – 6.02 (m, 1H), 5.40 – 5.14 (m, 1H), 4.76 – 4.58 (m, 1H), 4.58 – 4.46 (m, 1H), 4.43 – 4.27 (m, 1H), 4.00 (d,  $J = 7.1$  Hz, 1H), 3.95 (s, 2H), 2.42 (d,  $J = 5.6$  Hz, 1H), 1.91 (d,  $J = 5.6$  Hz, 1H), 1.39 (t,  $J = 7.1$  Hz, 1H), 0.98 (t,  $J = 7.1$  Hz, 1H).

<sup>19</sup>F NMR (376 MHz,  $CDCl_3$ )  $\delta = -174.54$  (s),  $-175.11$  (s).

<sup>13</sup>C NMR (101 MHz,  $CDCl_3$ )  $\delta = 201.8$  (dd,  $J = 37.3, 29.8$  Hz), 164.9 (dd,  $J = 47.0, 26.0$  Hz), 157.9 (t,  $J = 10.3$  Hz), 135.2 (s), 134.51 (s), 134.0 (d,  $J = 4.2$  Hz), 133.9 (s), 133.8 (s), 132.2 (s), 131.5 (s), 129.6 (s), 129.6 (s), 129.4 (s), 128.8 (d,  $J = 2.2$  Hz), 128.6 (s), 127.8 (d,  $J = 2.2$  Hz), 127.7 (d,  $J = 2.5$  Hz), 127.5 (d,  $J = 2.6$  Hz), 127.2 (d,  $J = 4.1$  Hz), 127.1 (s), 126.9 (s), 124.1 (s), 121.7 (s), 119.6 (s), 119.3 (s), 119.1 (s), 119.0 (s), 105.9 (s), 105.5 (d,  $J = 5.1$  Hz), 104.3 (s), 104.0 (s), 102.2 (s), 101.9 (s), 68.7 (s), 62.9 (s), 62.6 (s), 55.4 (s), 54.9 (s), 54.1 (dd,  $J = 18.1, 9.7$  Hz), 27.0 (d,  $J = 5.2$  Hz), 14.2 (s), 13.8 (s).

HRMS (ESI+) calcd for  $C_{20}H_{21}FNaO_4$   $[M+Na]^+$ : 367.1327, Found:367.1288.

The *ee* of the product was determined by chiral HPLC [Daicel CHIRALCEL AD-H (0.46 cm x 25 cm); hexane/2-propanol = 98/2, flow rate = 0.5 mL/min; detection wavelength = 214 nm;  $t_R = 54.457$  (minor), 49.822 (major) min].  $[\alpha]_D^{20} = +43.30^\circ$  (c 1.0,  $CH_3OH$ ).

IR (KBr):  $\nu$  max (cm<sup>-1</sup>) = 3116, 2980, 2935, 2854, 1734, 1645, 1283, 1255, 1170, 766.

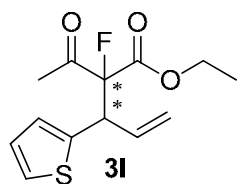



Ethyl 2-acetyl-2-fluoro-3-(thiophen-2-yl)pent-4-enoate (**3l**)

Yield: 90% (24.3 mg); *ee*: 99%; colorless oil.

<sup>1</sup>H NMR (400 MHz, CDCl<sub>3</sub>) δ = 7.43 – 7.15 (m, 1H), 7.11 – 6.88 (m, 2H), 6.20 – 5.80 (m, 1H), 5.34 – 5.08 (m, 2H), 4.72 (dd, *J* = 32.3, 8.8 Hz, 1H), 4.34 – 4.22 (m, 1H), 4.18 – 4.02 (m, 1H), 2.33 (d, *J* = 5.6 Hz, 1H), 2.05 (d, *J* = 5.5 Hz, 1H), 1.32 (t, *J* = 7.1 Hz, 1H), 1.12 (t, *J* = 7.1 Hz, 1H).

<sup>19</sup>F NMR (377 MHz, CDCl<sub>3</sub>) δ = -174.68 (d, *J* = 67.5 Hz).

<sup>13</sup>C NMR (101 MHz, CDCl<sub>3</sub>) δ = 201.6 (d, *J* = 29.6 Hz), 201.3 (d, *J* = 33.2 Hz), 164.6 (d, *J* = 21.5 Hz), 164.4 (d, *J* = 21.6 Hz), 138.5 (s), 137.99 (s), 133.6 (d, *J* = 4.0 Hz), 133.3 (d, *J* = 4.7 Hz), 127.1 (s), 126.8 (s), 126.8 (s), 126.6 (d, *J* = 1.7 Hz), 125.5 (s), 125.2 (s), 120.0 (s), 119.5 (s), 103.4 (d, *J* = 32.8 Hz), 101.3 (d, *J* = 33.7 Hz), 63.0 (s), 62.8 (s), 49.4 (d, *J* = 19.2 Hz), 27.0 (s), 26.8 (s), 14.1 (s), 13.8 (s).

HRMS (ESI+) calcd for C<sub>13</sub>H<sub>15</sub>FNaO<sub>3</sub>S [M+Na]<sup>+</sup>: 293.0618, Found: 293.0614.

The *ee* of the product was determined by chiral HPLC [Daicel CHIRALCEL IC (0.46 cm x 25 cm); hexane/2-propanol = 98/2, flow rate = 1.0 mL/min; detection wavelength = 214 nm; *t*<sub>R</sub> = 9.475 (minor), 9.143 (major) min]. [α]<sub>D</sub><sup>20</sup> = +33.30° (c 1.0, CH<sub>3</sub>OH).

IR (KBr): ν max (cm<sup>-1</sup>) = 3106, 2987, 2945, 2874, 1774, 1688, 1245, 1233, 1186, 768.

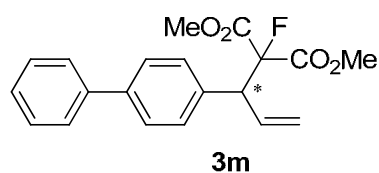

Dimethyl 2-(1-([1,1'-biphenyl]-4-yl)allyl)-2-fluoromalonate (**3m**)

Yield: 97% (1.27 g); *ee*: 95%; colorless oil.

<sup>1</sup>H NMR (400 MHz, CDCl<sub>3</sub>) δ = 7.62 (t, *J* = 8.9 Hz, 4H), 7.48 (dd, *J* = 13.9, 7.5 Hz, 4H), 7.39 (t, *J* = 7.3 Hz, 1H), 6.32 – 6.12 (m, 1H), 5.32 (t, *J* = 12.6 Hz, 2H), 4.49 (dd, *J* = 31.7, 8.9 Hz, 1H), 3.93 (s, 3H), 3.68 (s, 3H).

<sup>19</sup>F NMR (376 MHz, CDCl<sub>3</sub>) δ = -175.93 (s).

<sup>13</sup>C NMR (101 MHz, CDCl<sub>3</sub>) δ = 165.7 (d, *J* = 25.8 Hz), 165.3 (d, *J* = 25.9 Hz), 140.6 (d, *J* = 6.2 Hz), 135.5 (s), 133.7 (d, *J* = 4.6 Hz), 129.6 (d, *J* = 2.2 Hz), 128.8 (s), 127.5 (s), 127.3 (s), 127.1 (s), 119.7 (s), 97.5 (d, *J* = 209.3 Hz), 54.3 (s), 54.1 (s), 53.5 (d, *J* = 28.1 Hz).

HRMS (ESI+) calcd for C<sub>20</sub>H<sub>19</sub>FNaO<sub>4</sub> [M+Na]<sup>+</sup>: 365.1159, Found: 365.1151.

The *ee* of the product was determined by chiral HPLC [Daicel CHIRALCEL IC (0.46 cm x 25 cm); hexane/2-propanol = 98/2, flow rate = 1.0 mL/min; detection wavelength = 214 nm; *t*<sub>R</sub> = 23.768 (major), 33.878 (minor) min]. [α]<sub>D</sub><sup>20</sup> = +68.87° (c 1.0, CH<sub>3</sub>OH).

IR (KBr): ν max (cm<sup>-1</sup>) = 3106, 2987, 2945, 2874, 1774, 1688, 1245, 1233, 1186, 1178, 1099, 988, 856, 807, 768.

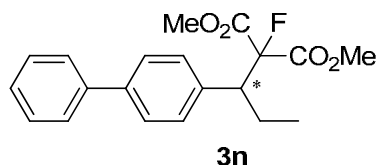

Dimethyl 2-(1-([1,1'-biphenyl]-4-yl)propyl)-2-fluoromalonate (**3n**)

Yield: 95% (1.20 g); *ee*: 97%; colorless oil.

$\delta$  =  $^1\text{H}$  NMR (400 MHz,  $\text{CDCl}_3$ )  $\delta$  = 7.64 (d,  $J$  = 7.7 Hz, 2H), 7.59 (d,  $J$  = 7.7 Hz, 2H), 7.48 (t,  $J$  = 7.5 Hz, 2H), 7.39 (d,  $J$  = 7.4 Hz, 3H), 3.96 (s, 3H), 3.65 (dd,  $J$  = 31.1, 10.5 Hz, 1H), 3.59 (s, 3H), 2.05 – 1.87 (m, 1H), 1.84 – 1.69 (m, 1H), 0.85 (t,  $J$  = 7.3 Hz, 3H).

$^{19}\text{F}$  NMR (376 MHz,  $\text{CDCl}_3$ )  $\delta$  = -177.10 (s).

$^{13}\text{C}$  NMR (101 MHz,  $\text{CDCl}_3$ )  $\delta$  = 166.4 (d,  $J$  = 25.7 Hz), 165.7 (d,  $J$  = 26.4 Hz), 140.6 (s), 140.4 (s), 135.8 (s), 129.9 (d,  $J$  = 1.9 Hz), 128.8 (s), 127.4 (s), 127.0 (s), 97.9 (d,  $J$  = 208.4 Hz), 53.7 (s), 53.1 (s), 51.7 (d,  $J$  = 19.2 Hz), 23.0 (d,  $J$  = 4.9 Hz), 12.1 (s).

HRMS (ESI+) calcd for  $\text{C}_{20}\text{H}_{21}\text{FNaO}_4$  [ $\text{M}+\text{Na}$ ] $^+$ : 367.1316, Found: 367.1320.

The *ee* of the product was determined by chiral HPLC [Daicel CHIRALCEL IC (0.46 cm x 25 cm); hexane/2-propanol = 98/2, flow rate = 1.0 mL/min; detection wavelength = 214 nm;  $t_{\text{R}}$  = 8.338(major), 12.147(minor) min].  $[\alpha]_{\text{D}}^{20}$  = -5.87° (c 1.0,  $\text{CH}_3\text{OH}$ ).

IR (KBr):  $\nu$  max (cm $^{-1}$ ) = 3126, 2989, 2955, 2874, 1247, 1237, 1186, 1178, 1099, 988, 819, 807, 768.

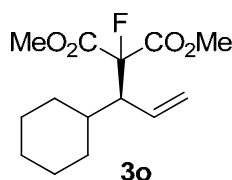

Dimethyl 2-(1-cyclohexylallyl)-2-fluoromalonate (**3o**)

Yield: 54% (14.7 mg); *ee*: 91%; Colorless oil.

$^1\text{H}$  NMR (400 MHz,  $\text{CDCl}_3$ )  $\delta$  = 5.79 (dt,  $J$  = 17.1, 10.3 Hz, 1H), 5.59 (dd,  $J$  = 15.4, 6.9 Hz, 1H), 5.42 – 5.30 (m, 1H), 5.24 (dd,  $J$  = 10.2, 1.6 Hz, 1H), 5.16 (d,  $J$  = 17.1 Hz, 1H), 3.90 (s, 3H), 3.86 (s, 5.6H), 3.80 (s, 3H), 3.02 – 2.92 (m, 1H), 2.90 (d,  $J$  = 7.2 Hz, 1.2H), 2.84 (d,  $J$  = 7.1 Hz, 1H), 2.03 – 1.83 (m, 2H), 1.80 – 1.63 (m, 8.2H), 1.54 – 1.43 (m, 1H), 1.35 – 0.93 (m, 11H) ppm.

$^{19}\text{F}$  NMR (376 MHz,  $\text{CDCl}_3$ )  $\delta$  = -166.69 (s), -175.34 (s) ppm.

$^{13}\text{C}$  NMR (101 MHz,  $\text{CDCl}_3$ )  $\delta$  = 166.5(d,  $J$  = 26.1 Hz), 166.4(d,  $J$  = 25.6 Hz), 166.0 (s), 143.4 (s), 132.6 (d,  $J$  = 3.2 Hz), 120.5 (s), 117.7 (d,  $J$  = 2.7 Hz), 98.5 (d,  $J$  = 208.5 Hz), 94.9 (d,  $J$  = 199.4 Hz), 54.3 (d,  $J$  = 18.7 Hz), 53.4 (s), 53.2 (s), 40.7 (s), 38.7 (s), 37.9 (d,  $J$  = 21.1 Hz), 32.8 (s), 32.1 (s), 29.5 (s), 29.4 (s), 26.6 (s), 26.4 (s), 26.1 (d,  $J$  = 2.3 Hz), 25.9 (s).

HRMS (ESI+) calcd for  $\text{C}_{14}\text{H}_{21}\text{FNaO}_4$  [ $\text{M}+\text{Na}$ ] $^+$ : 295.1316, Found: 295.1320.

The *ee* of the product was determined by chiral HPLC. [Daicel CHIRALCEL IC (0.46 cm x 25 cm); hexane/2-propanol = 95/5, flow rate = 1.2 mL/min; detection wavelength = 214 nm;  $t_R$  = 10.203 (minor), 11.392 (major) min].  $[\alpha]_D^{20} = +23.7^\circ$  (c 1.0, CH<sub>3</sub>OH).

IR (KBr):  $\nu$  max (cm<sup>-1</sup>) = 3095, 3053, 2902, 2887, 2865, 2812, 1460, 1428, 1360, 1037, 920, 830, 665, 531.

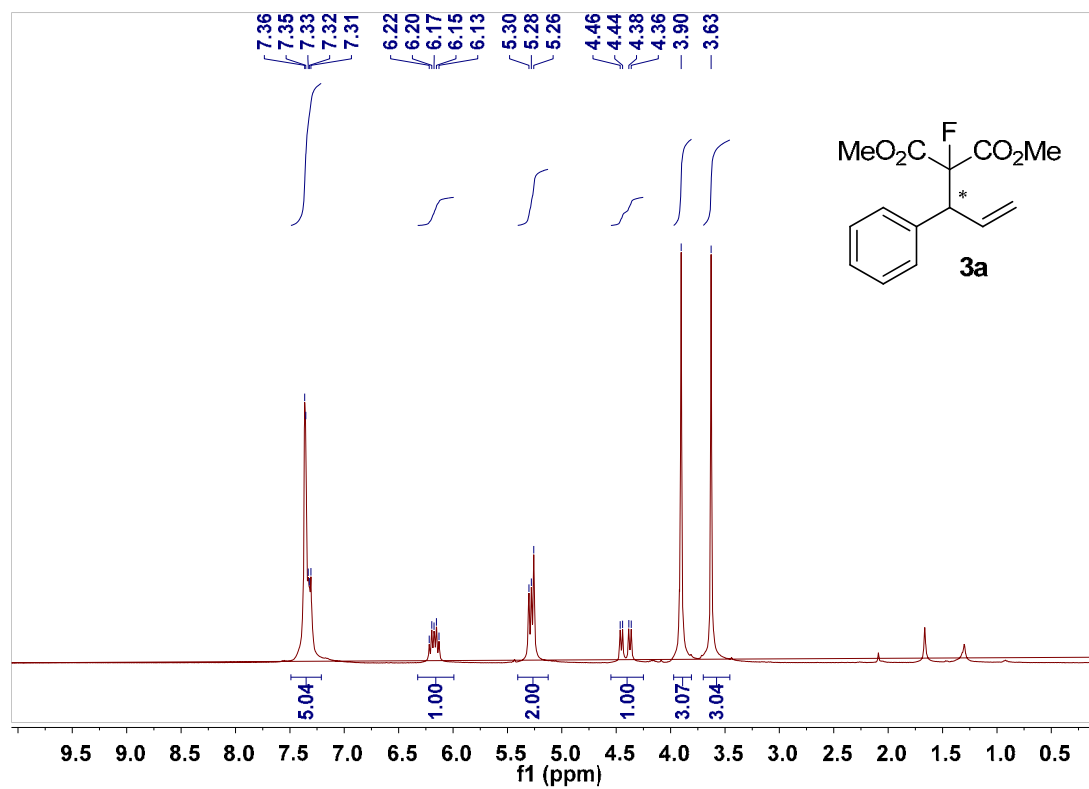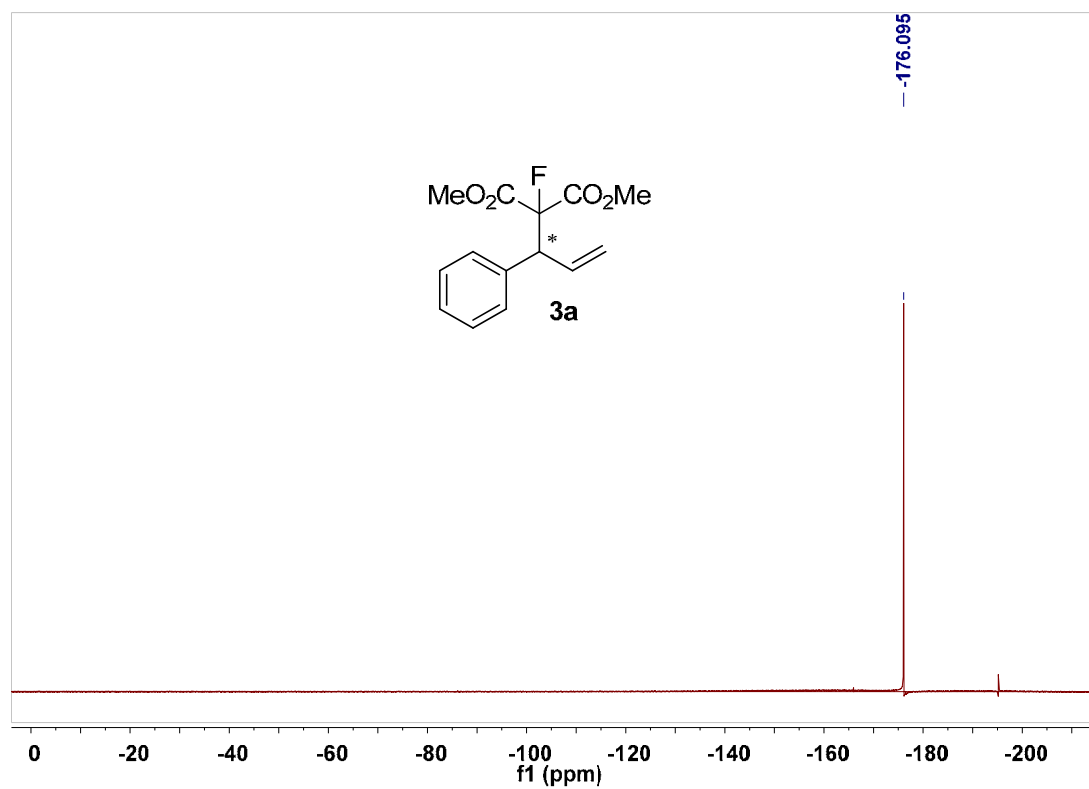

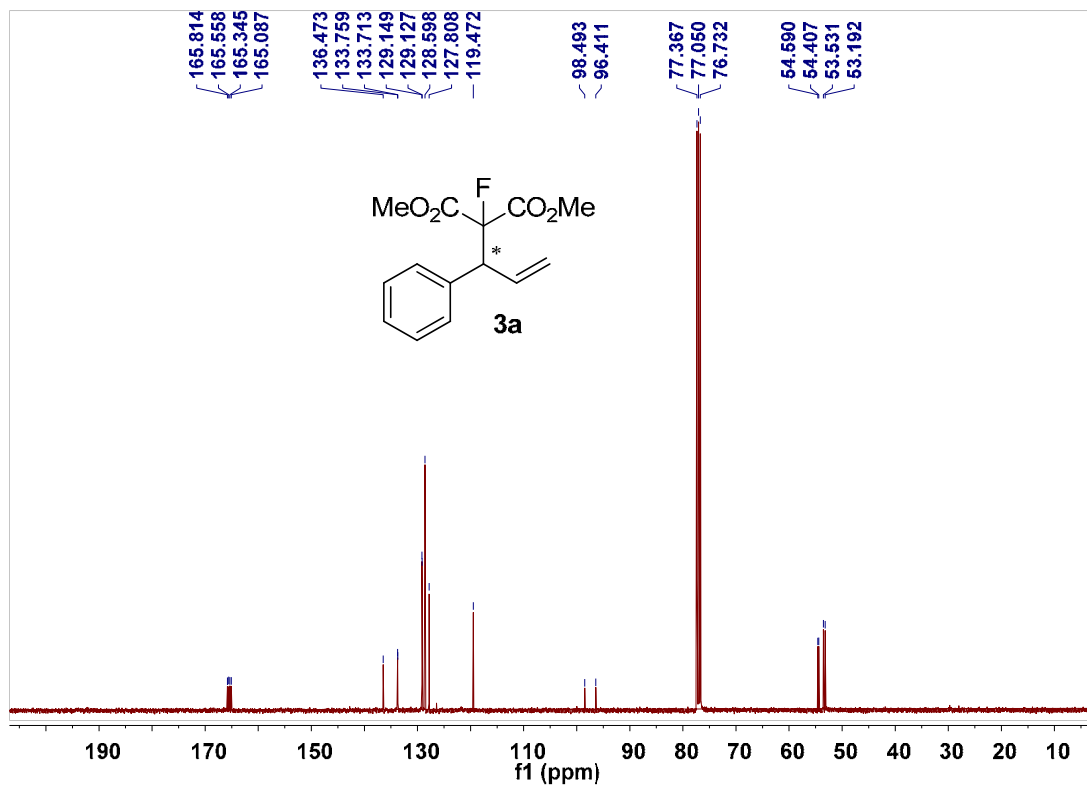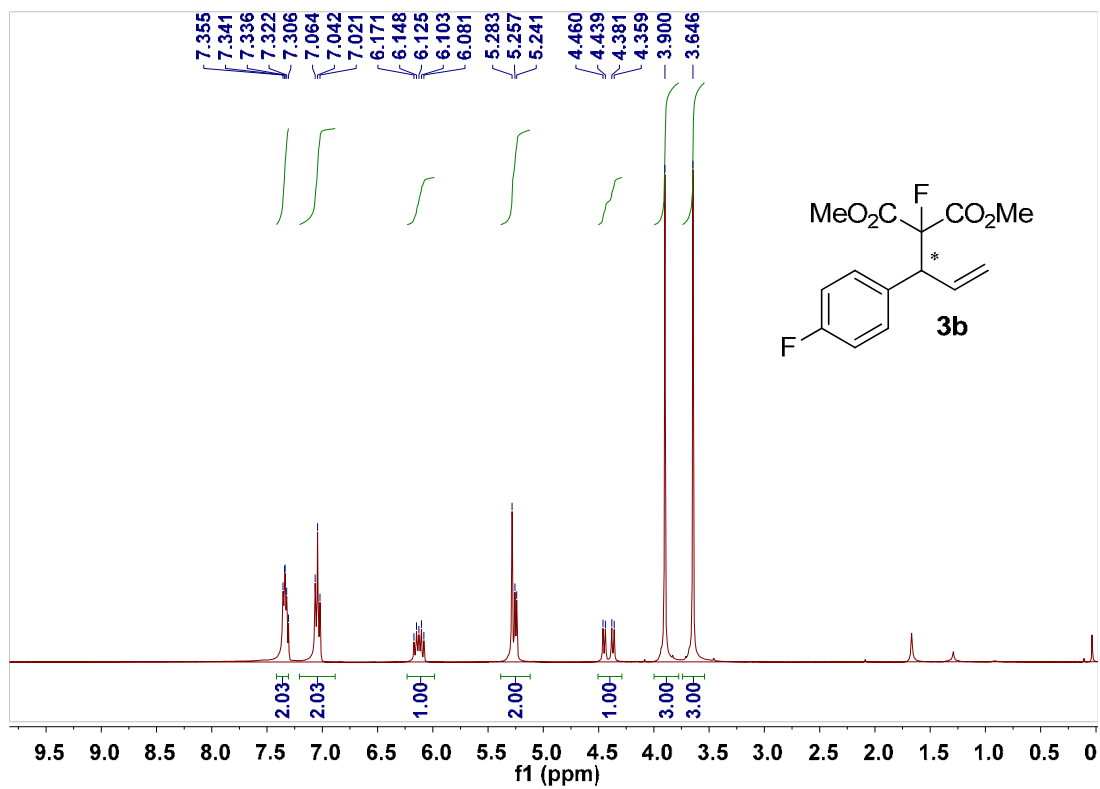

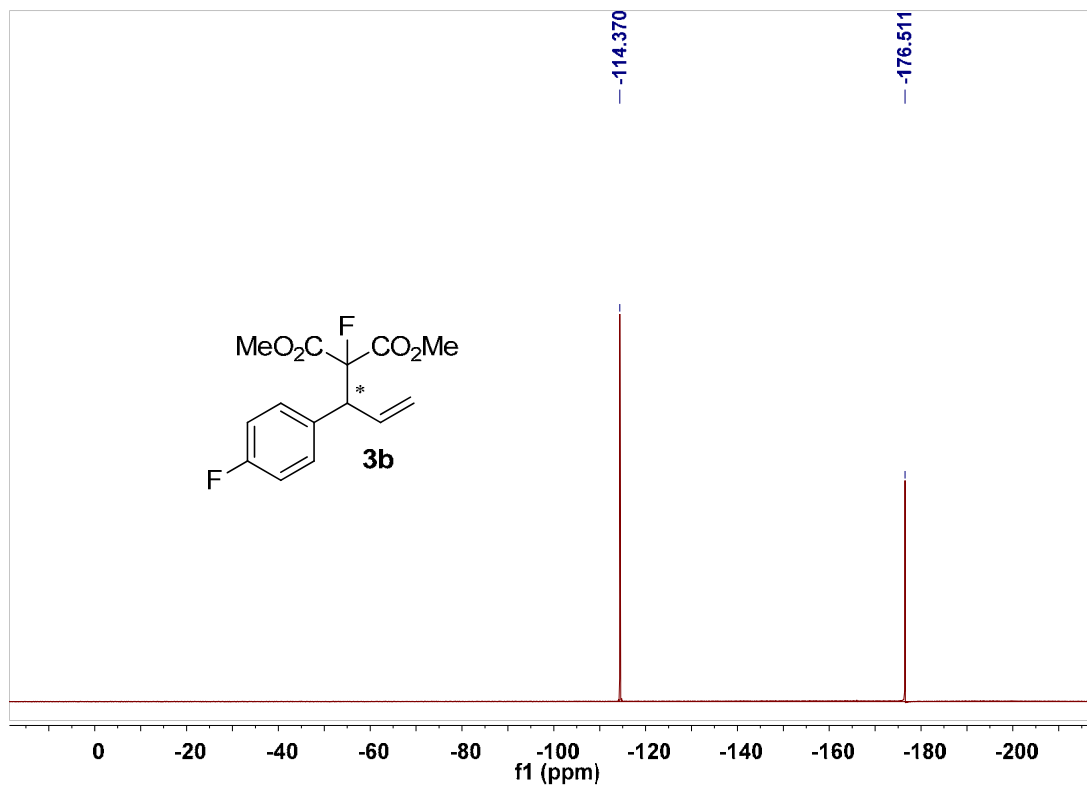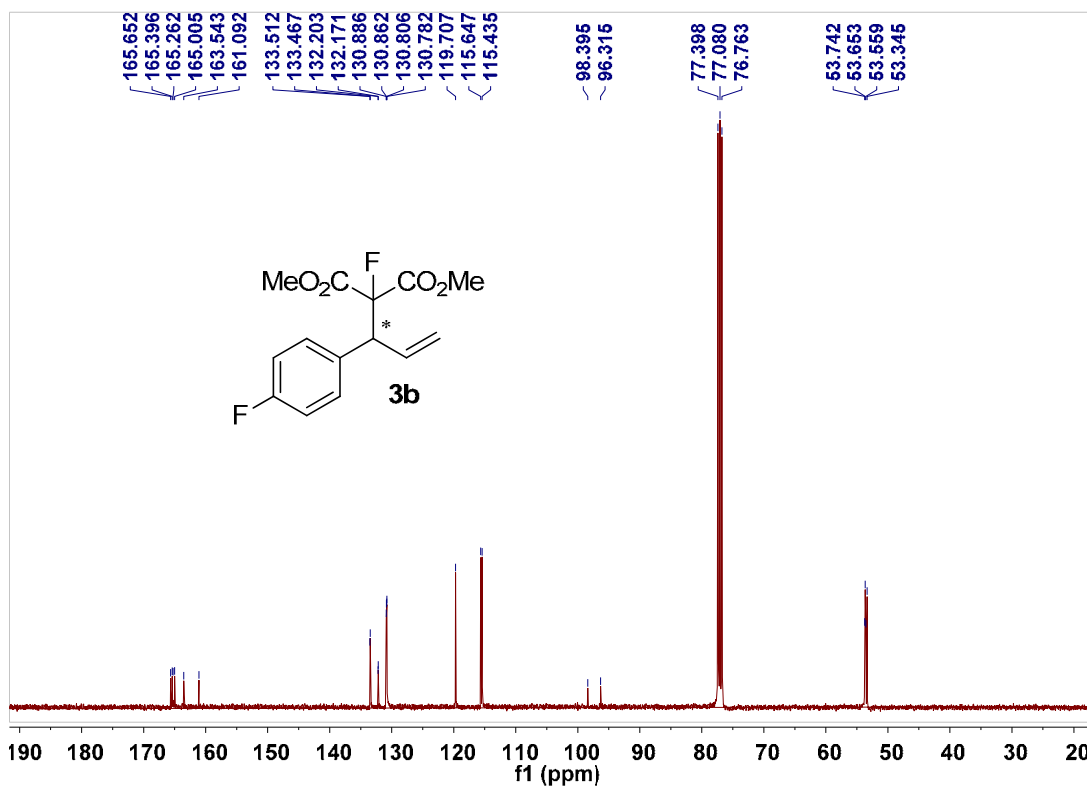

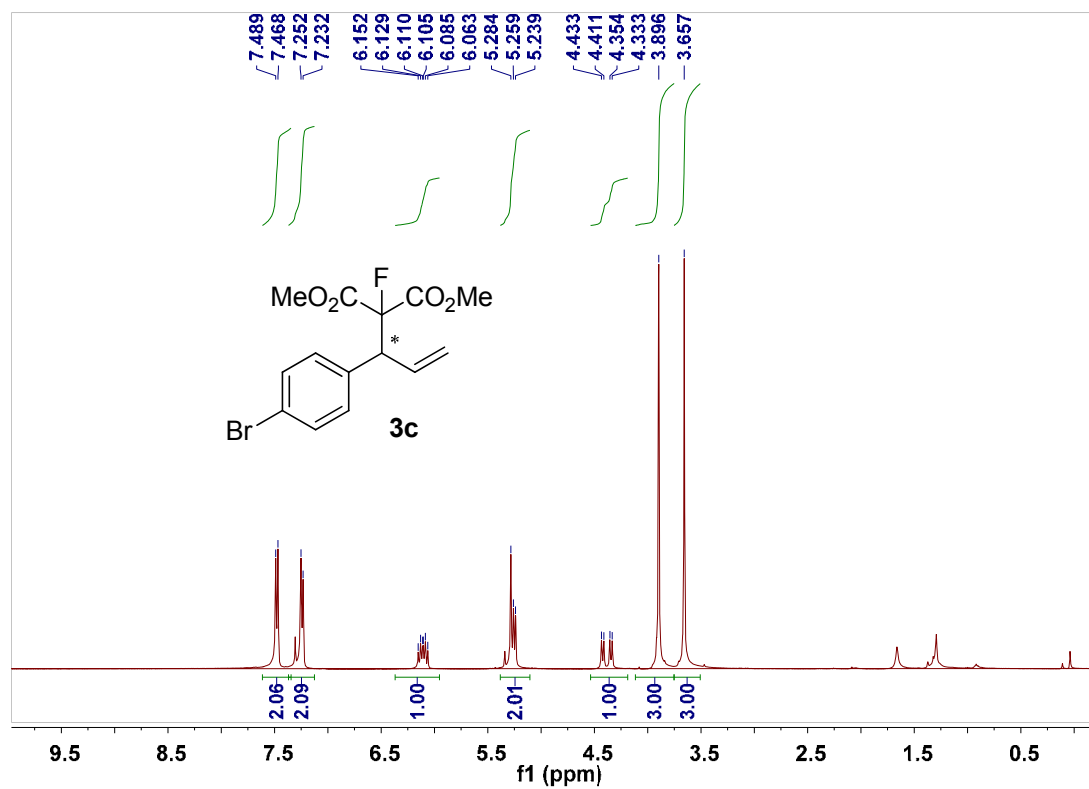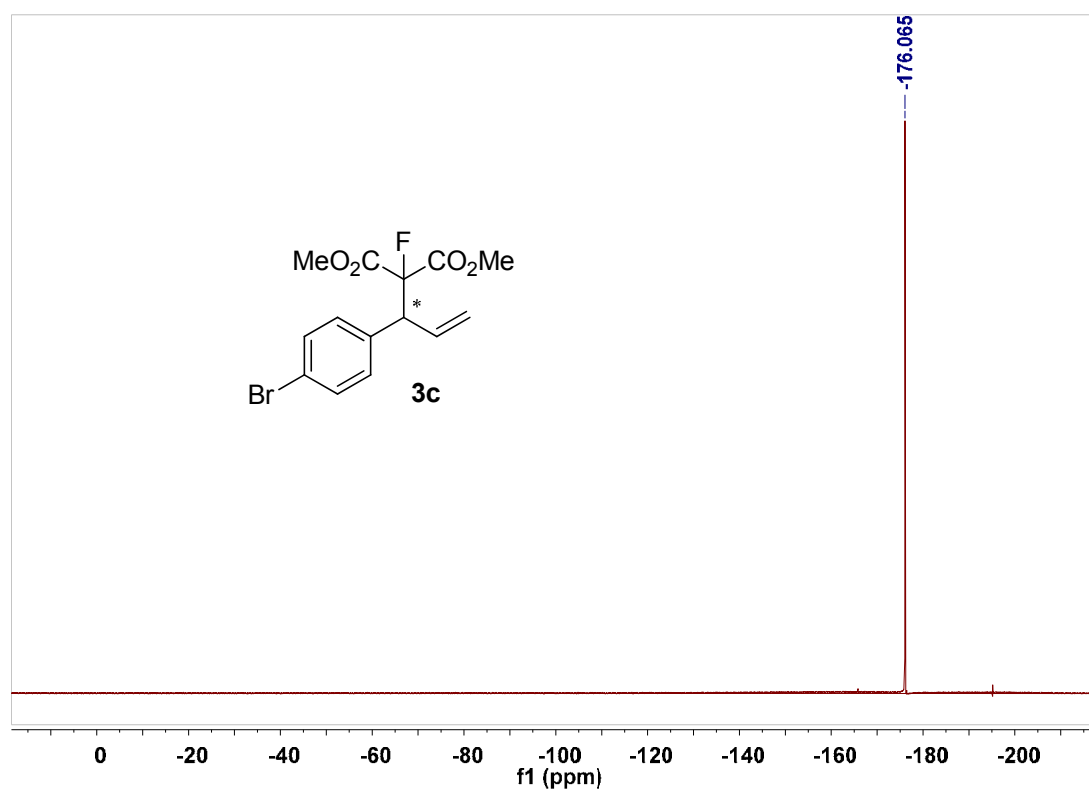

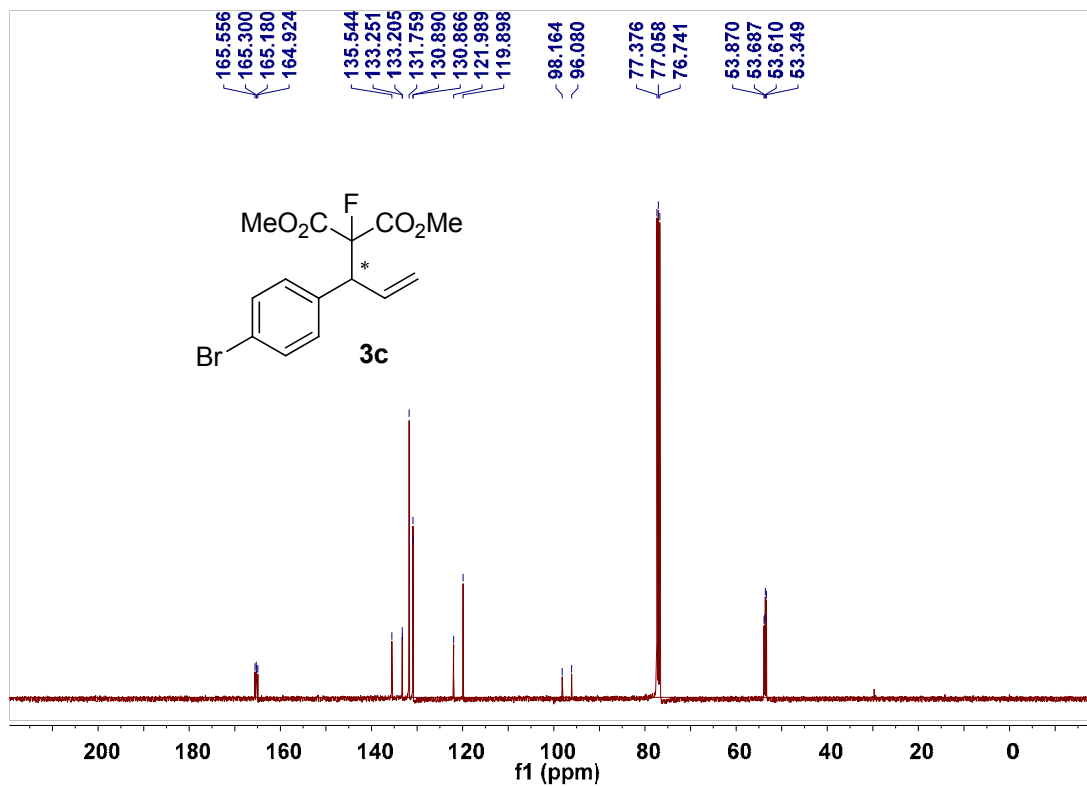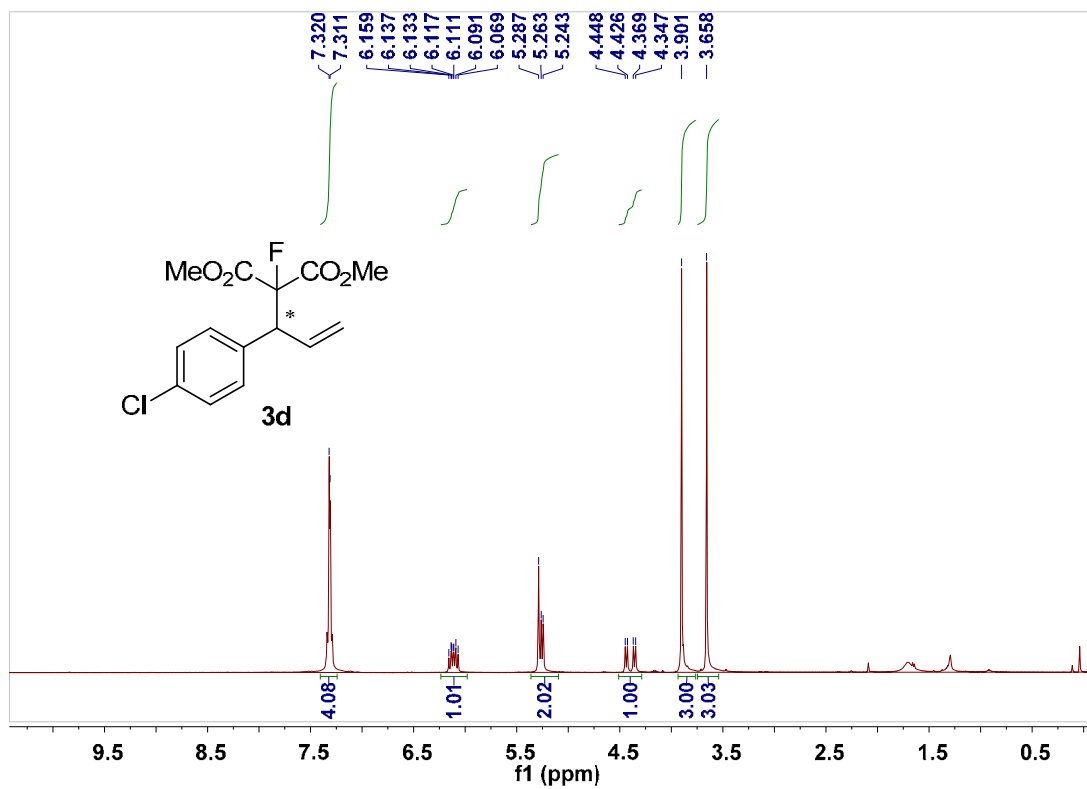



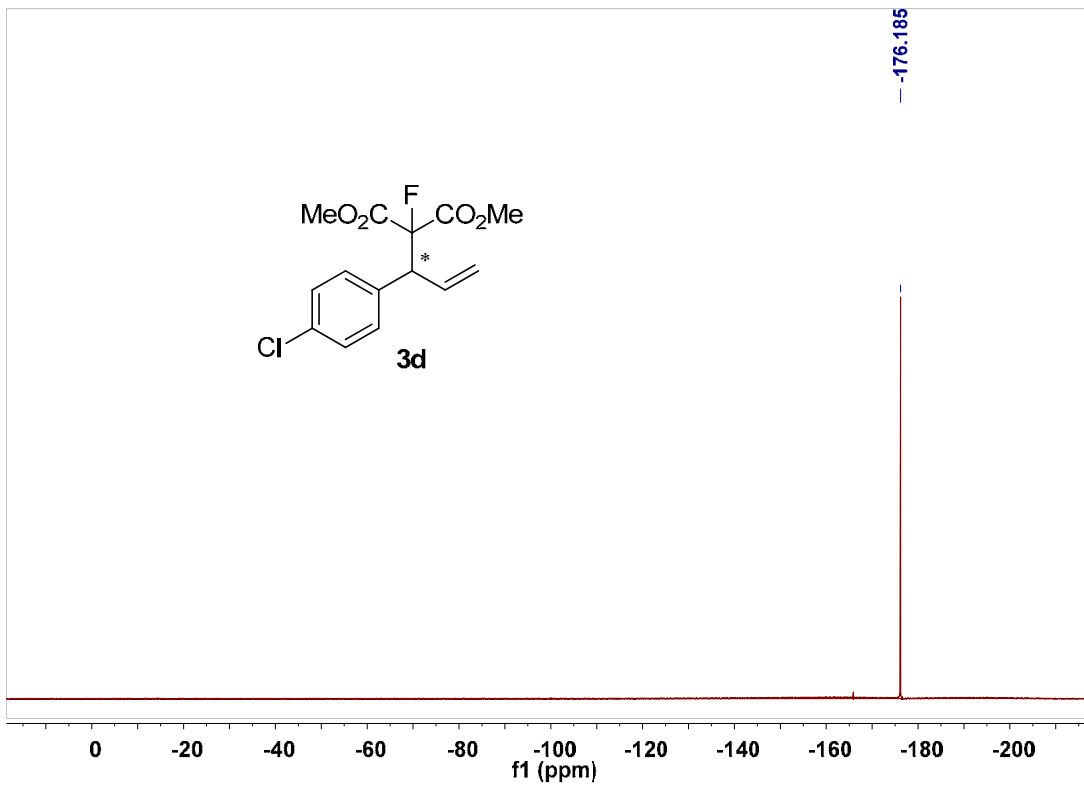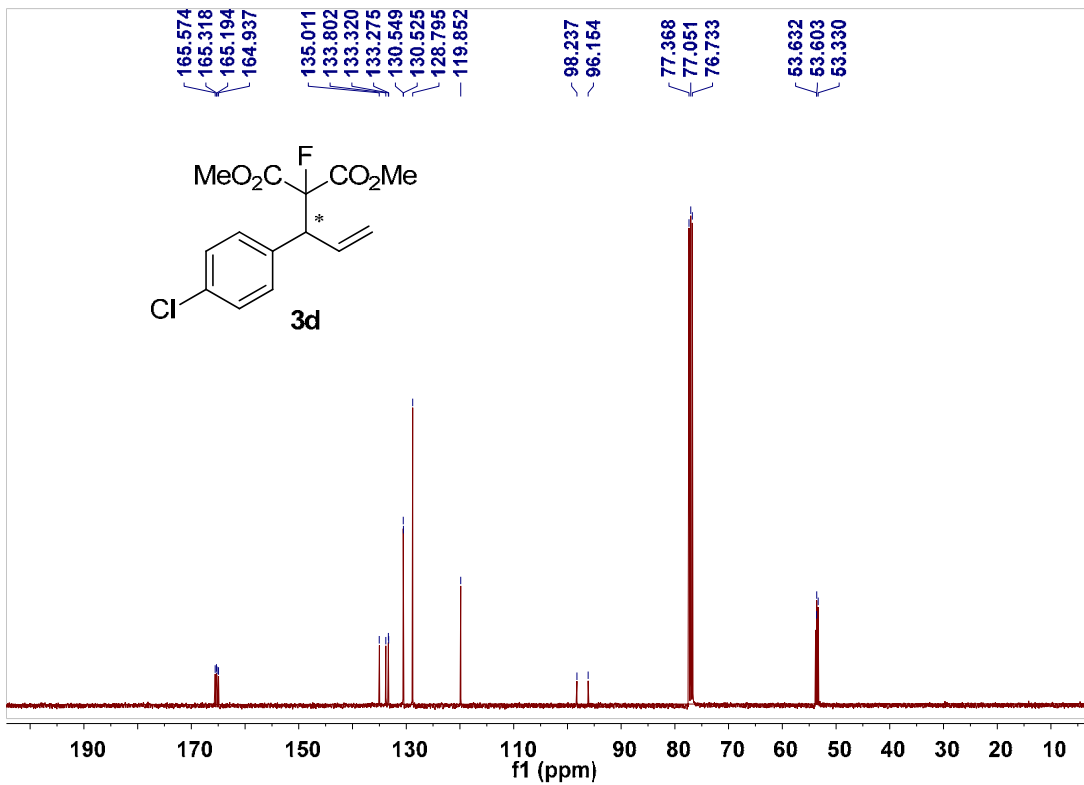

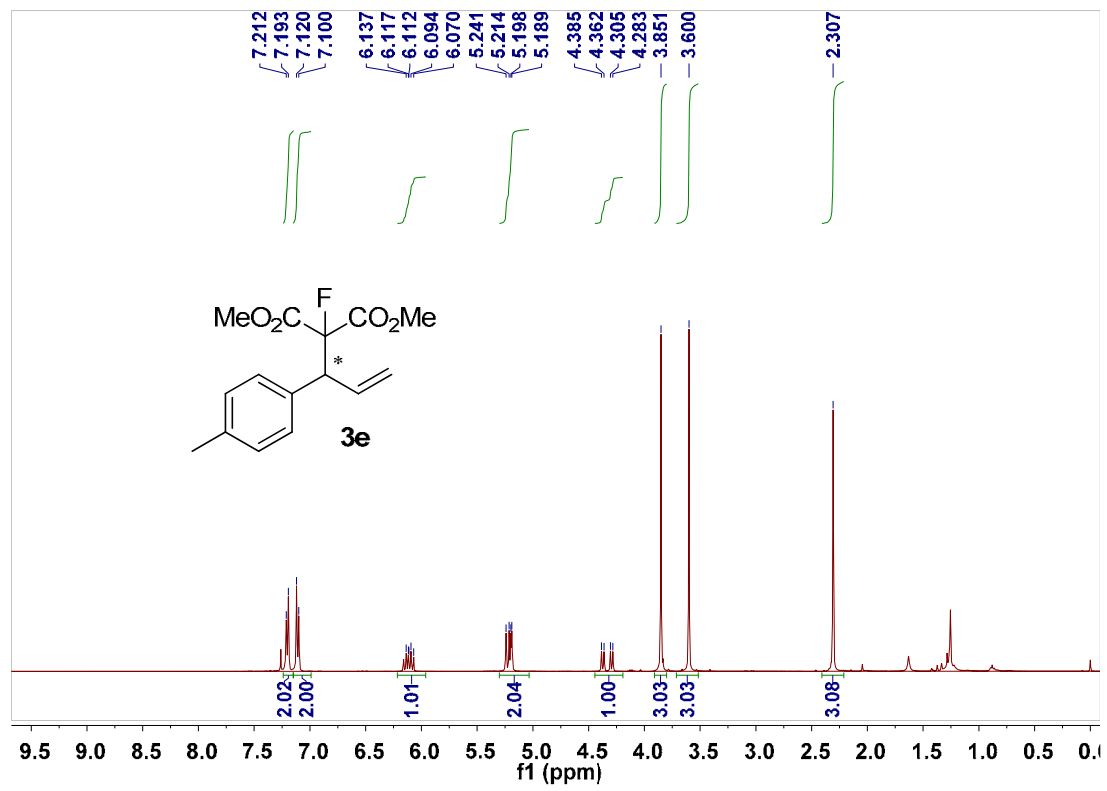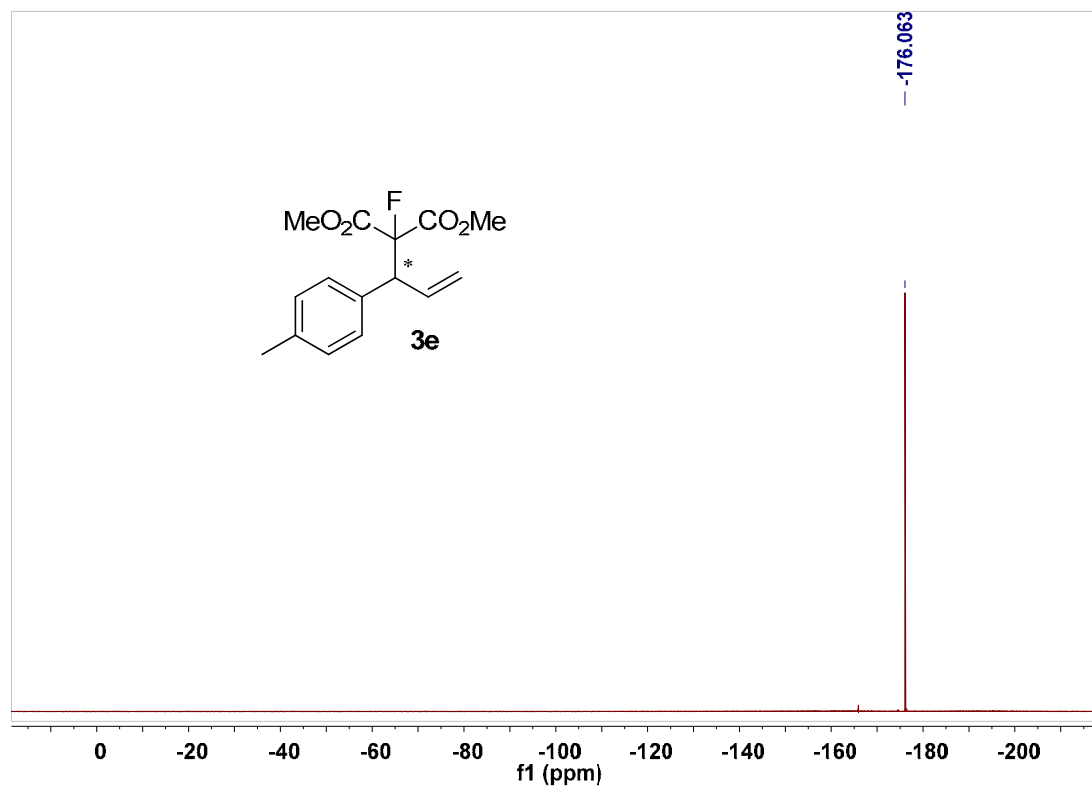

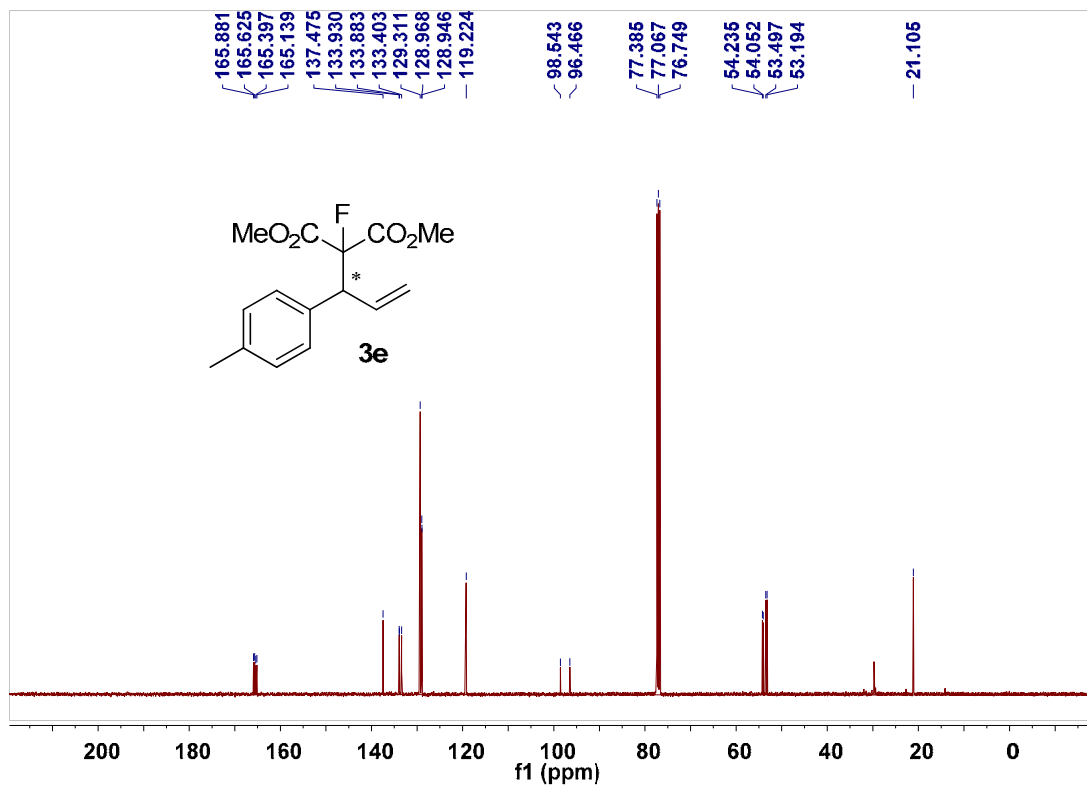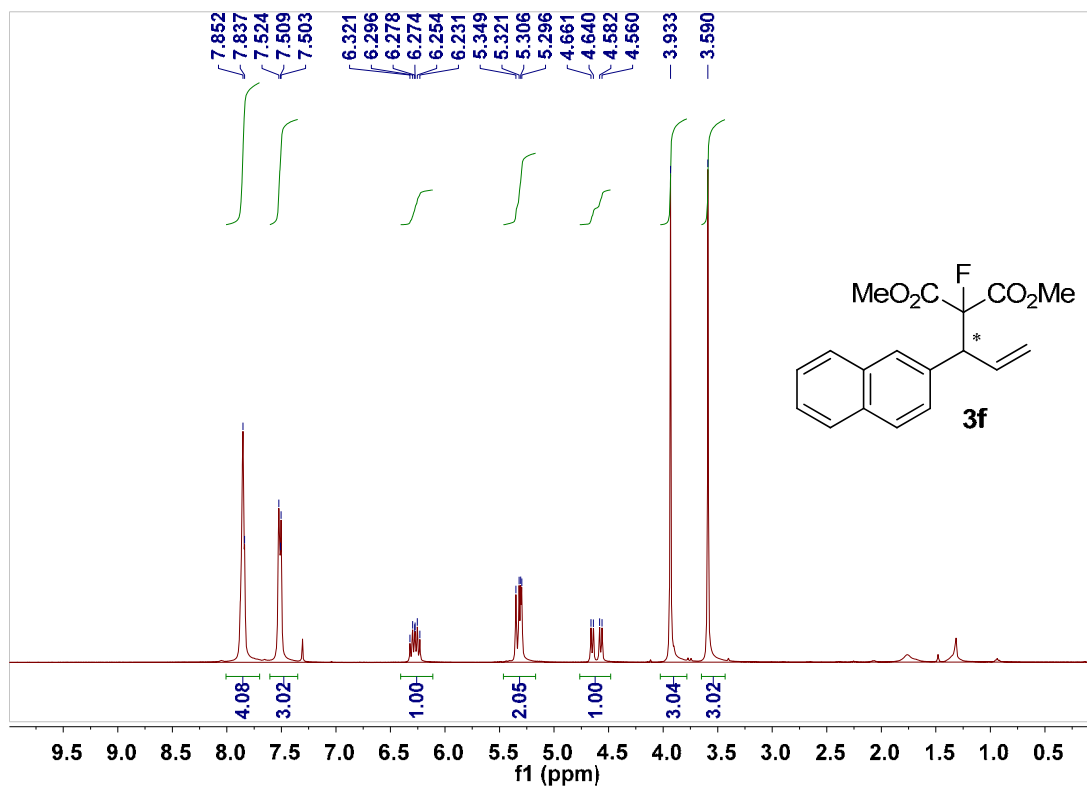

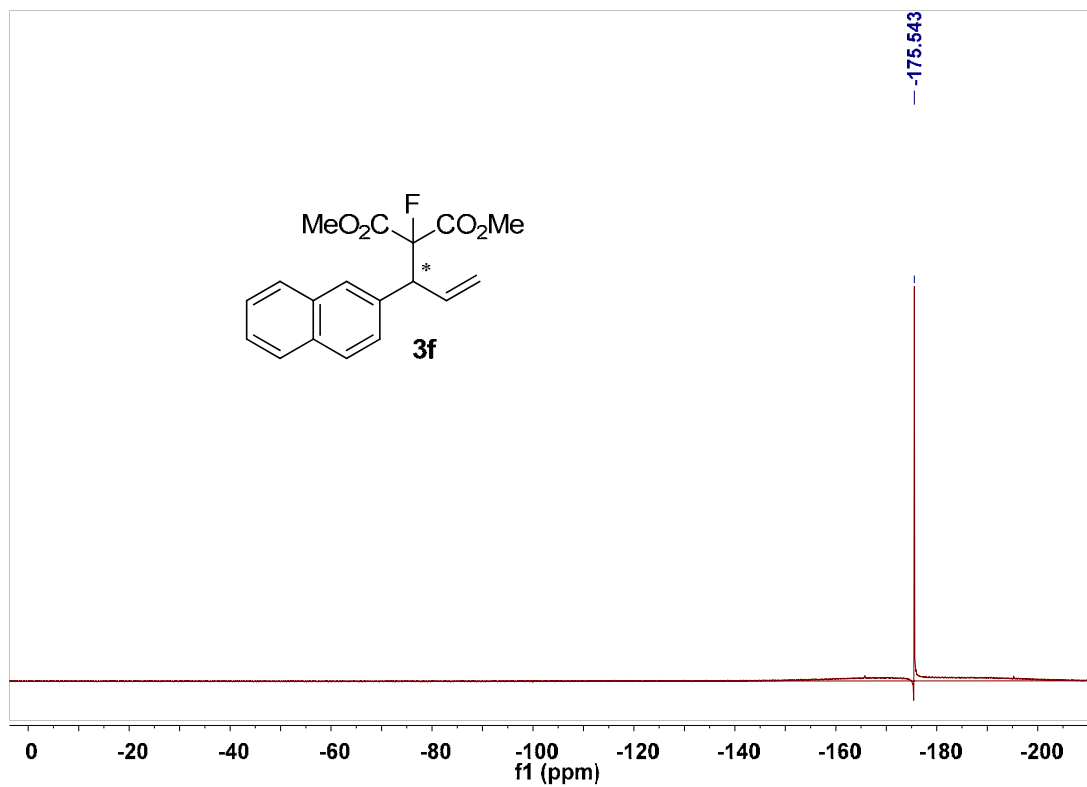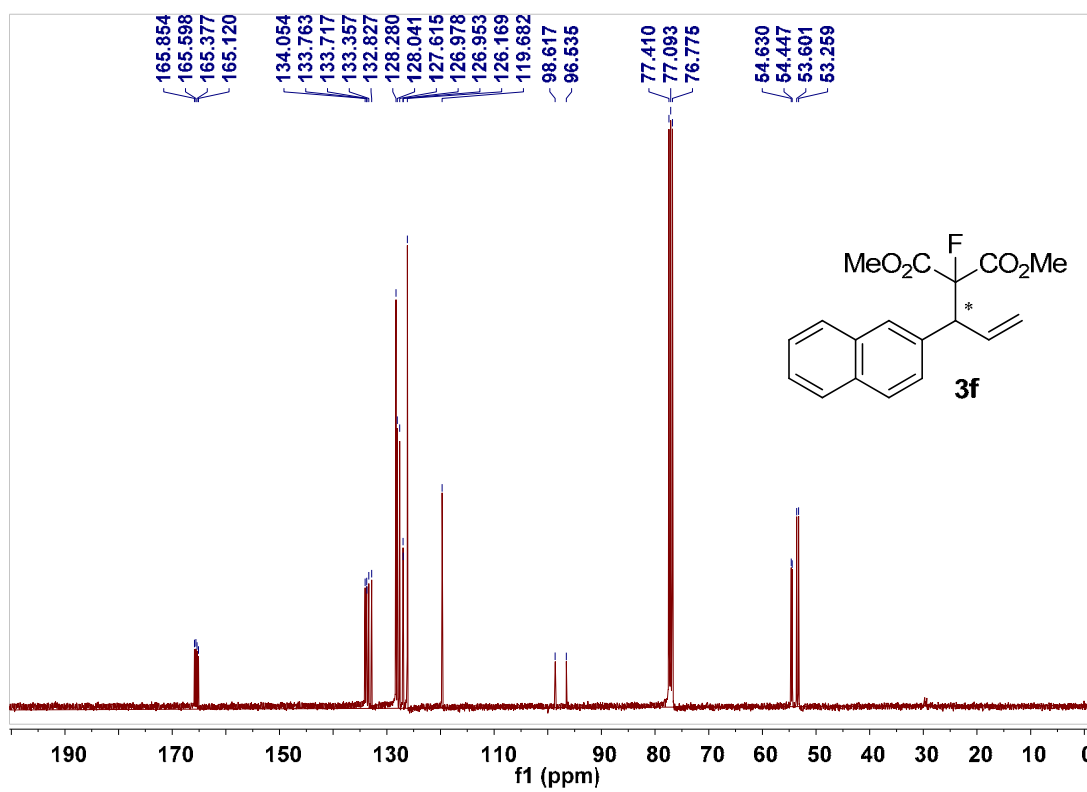

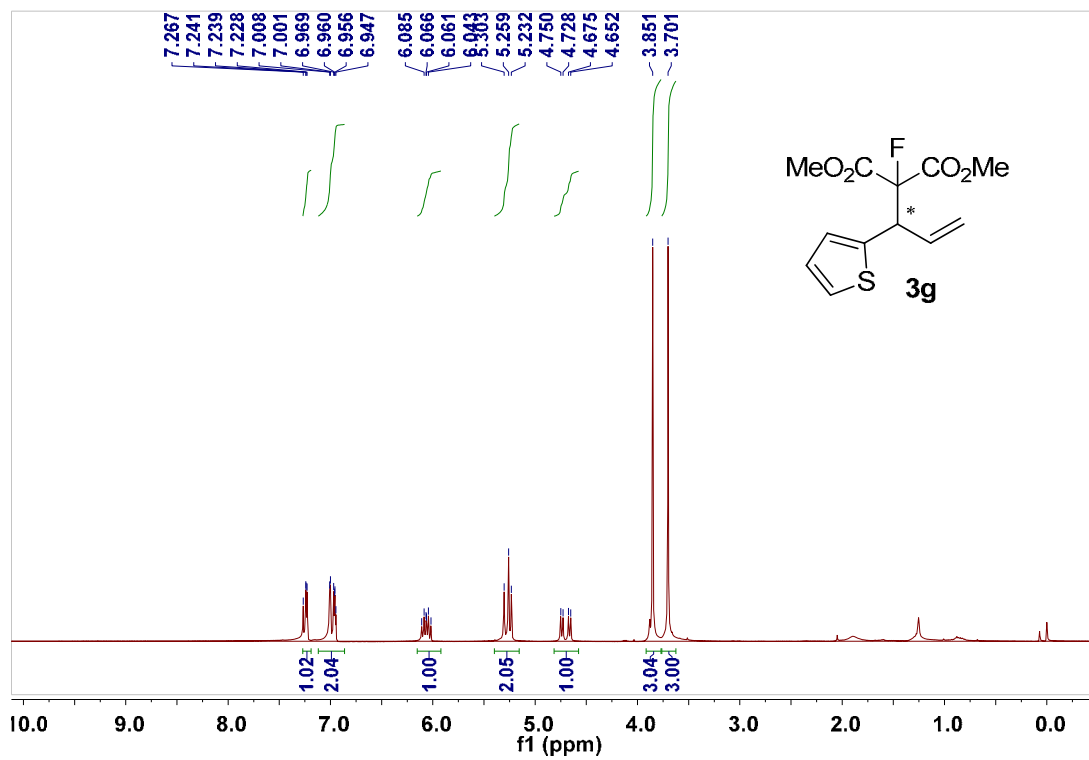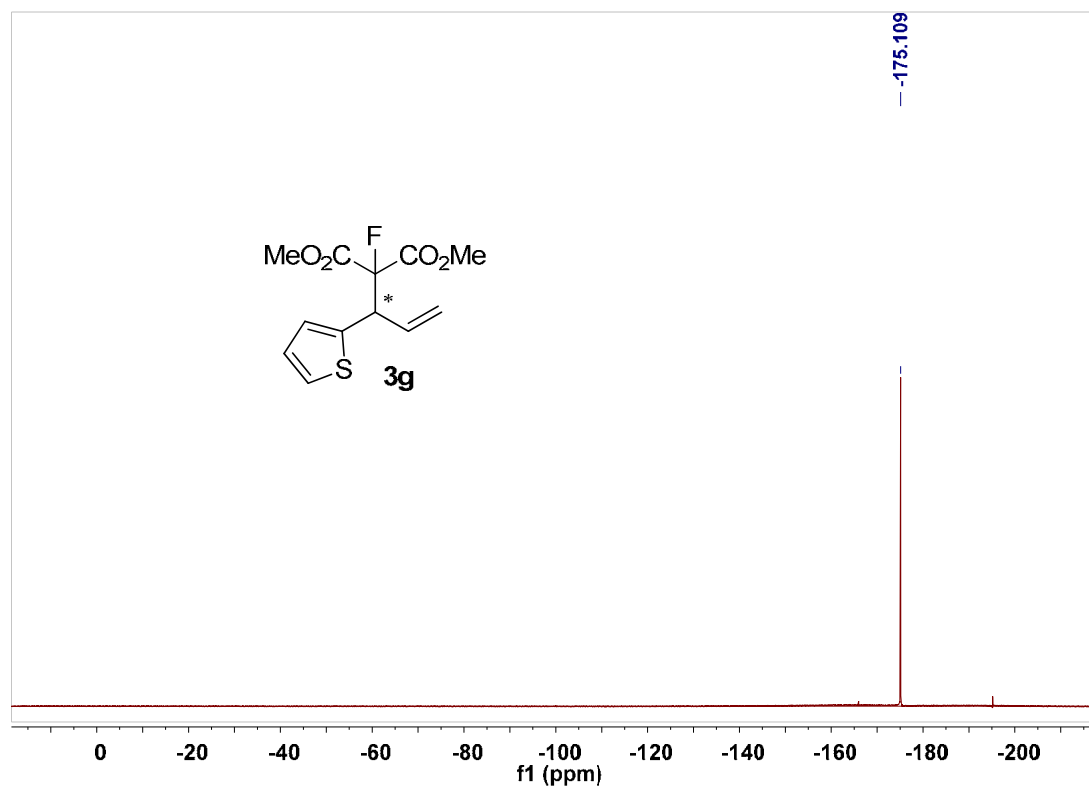

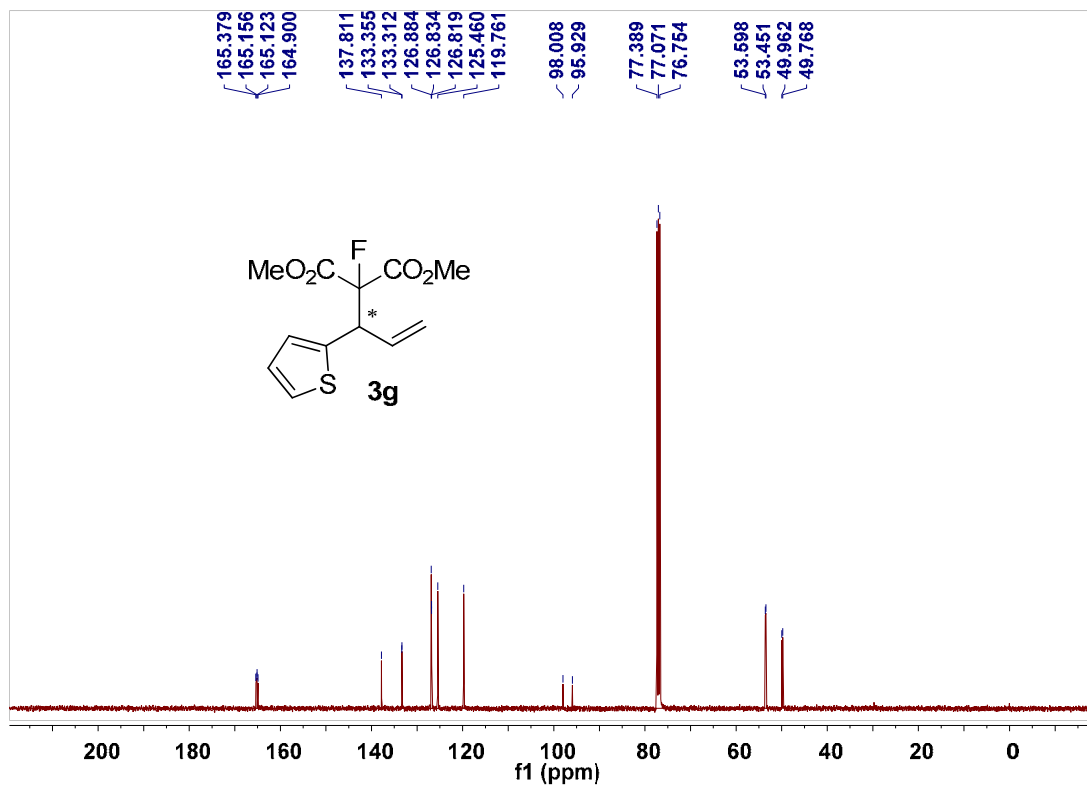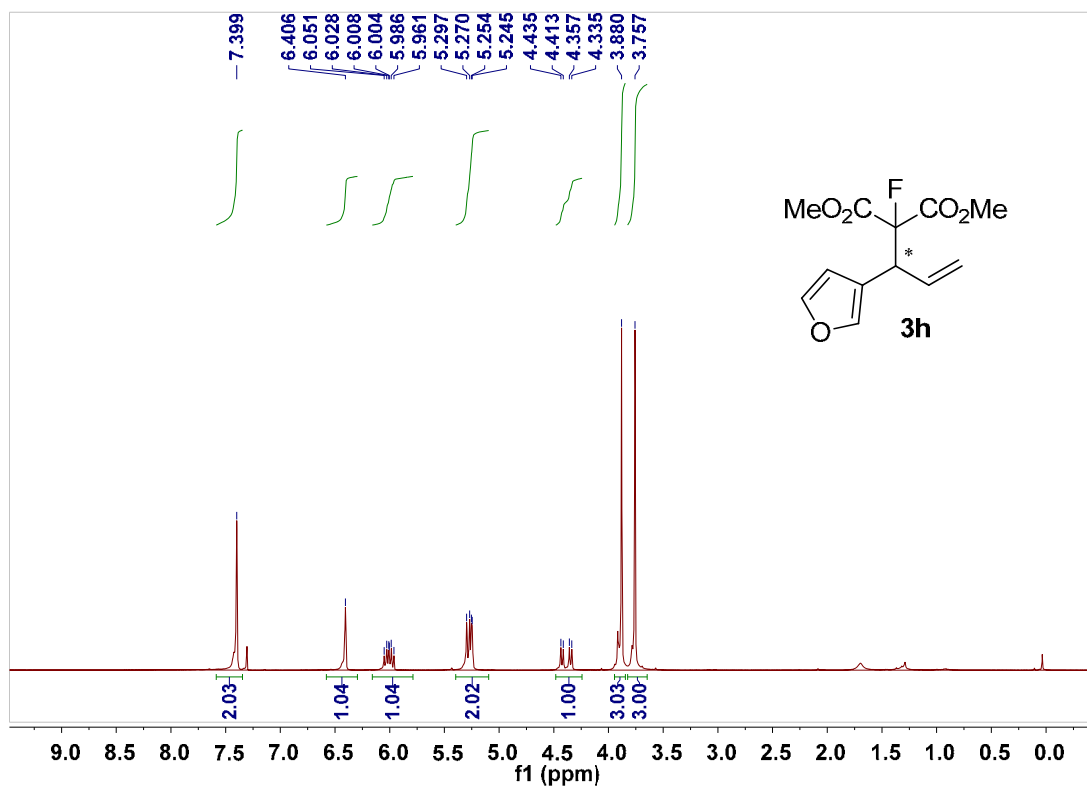

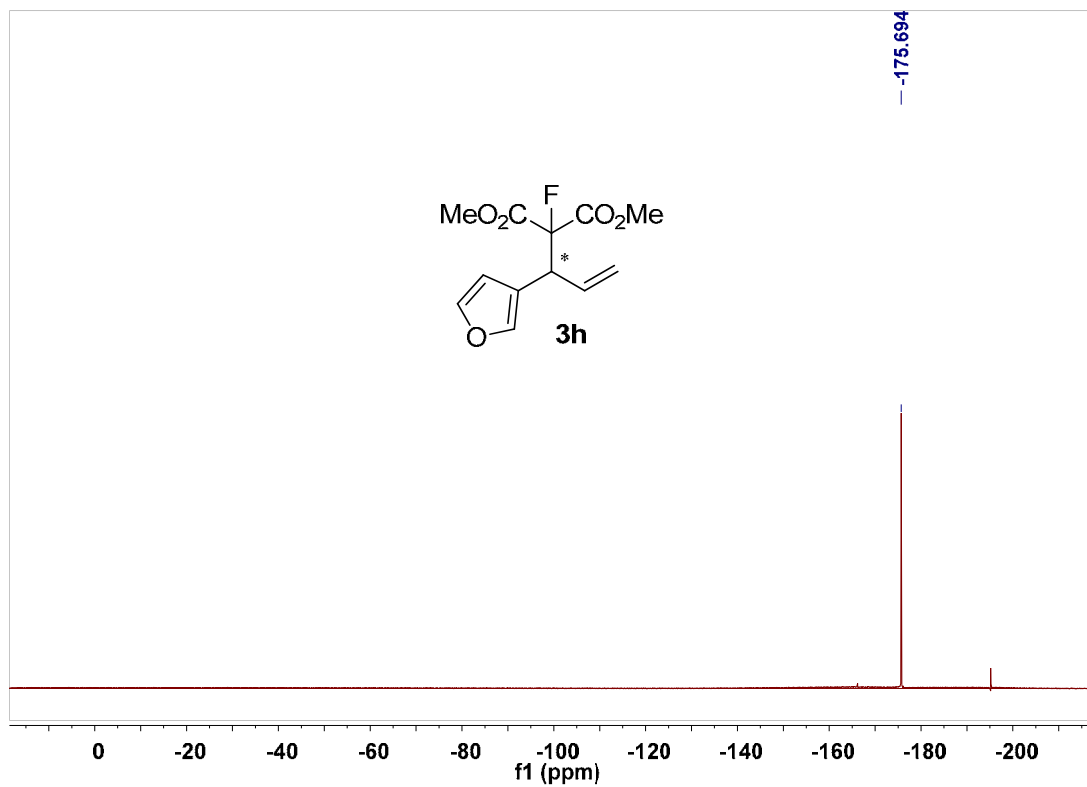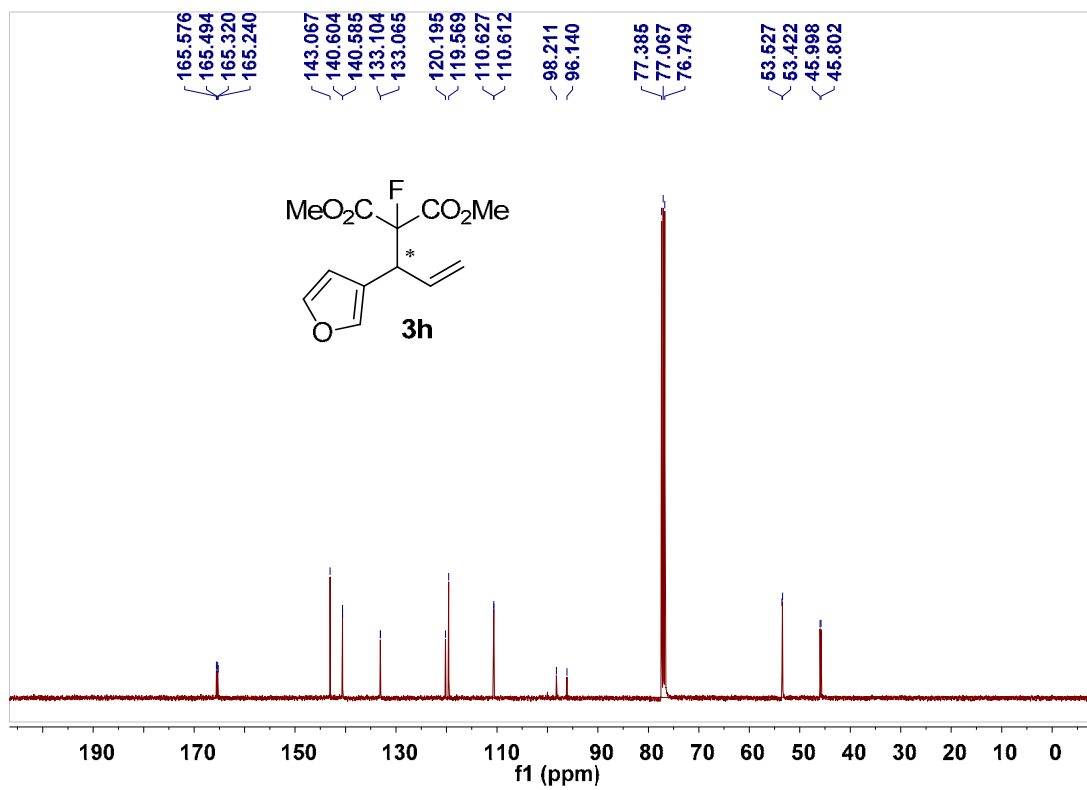

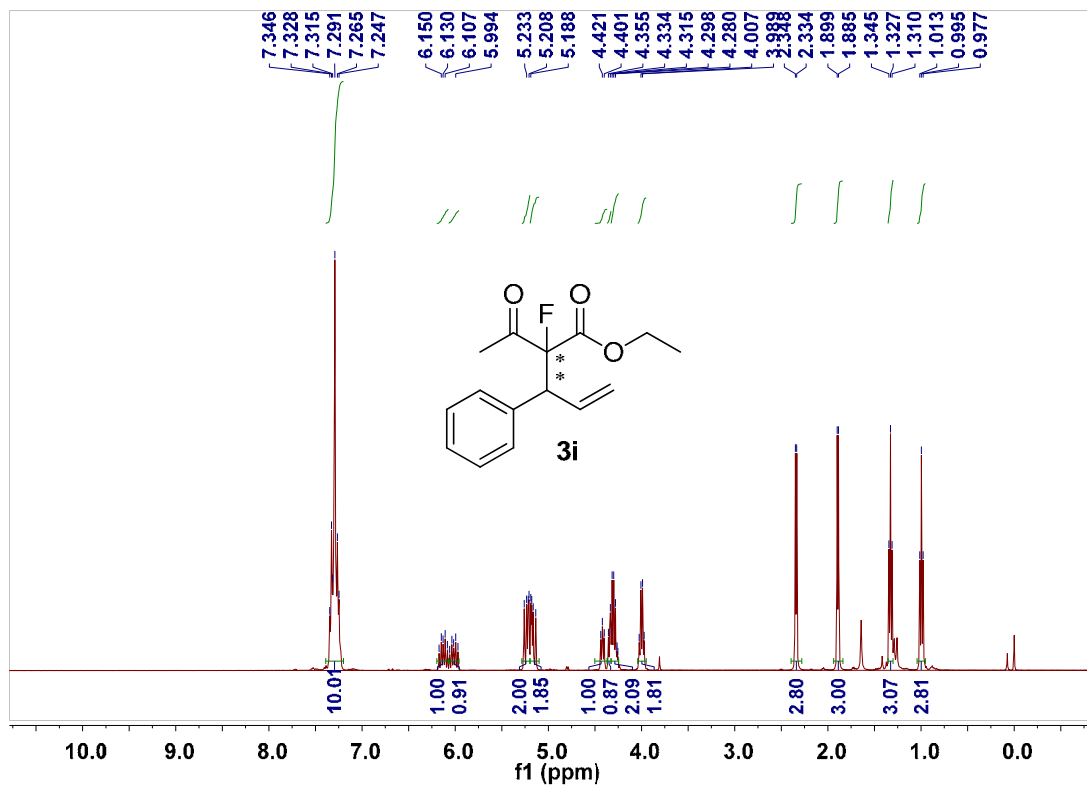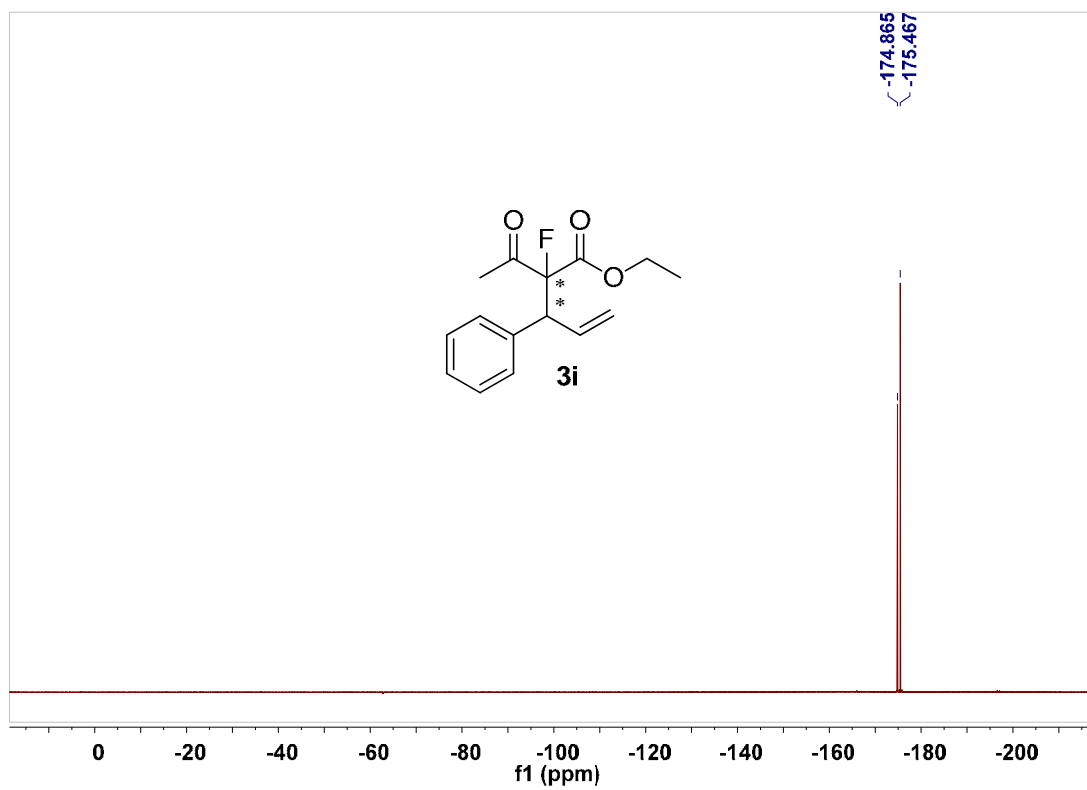



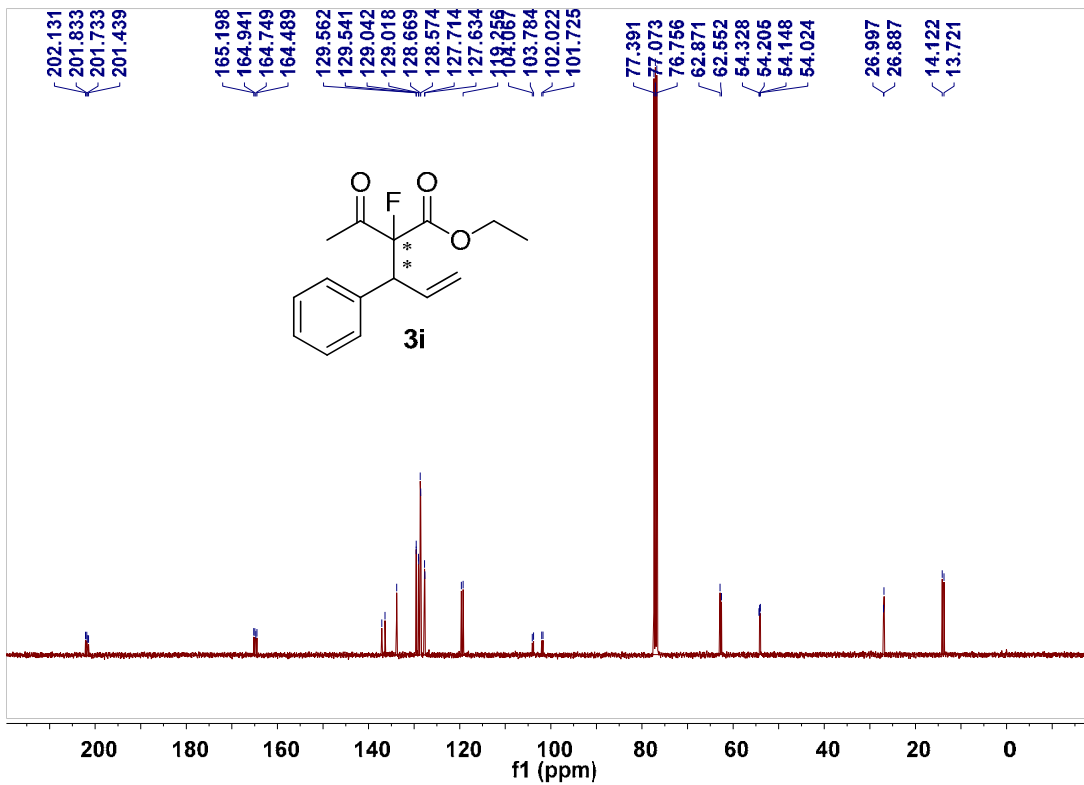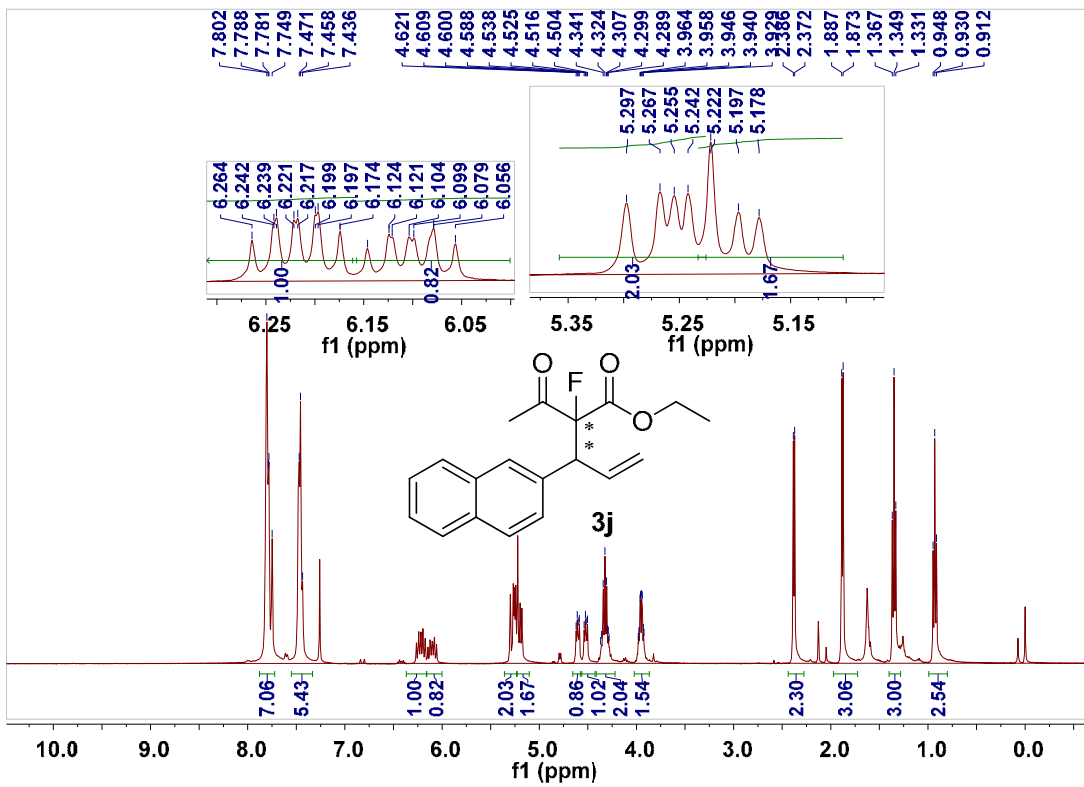

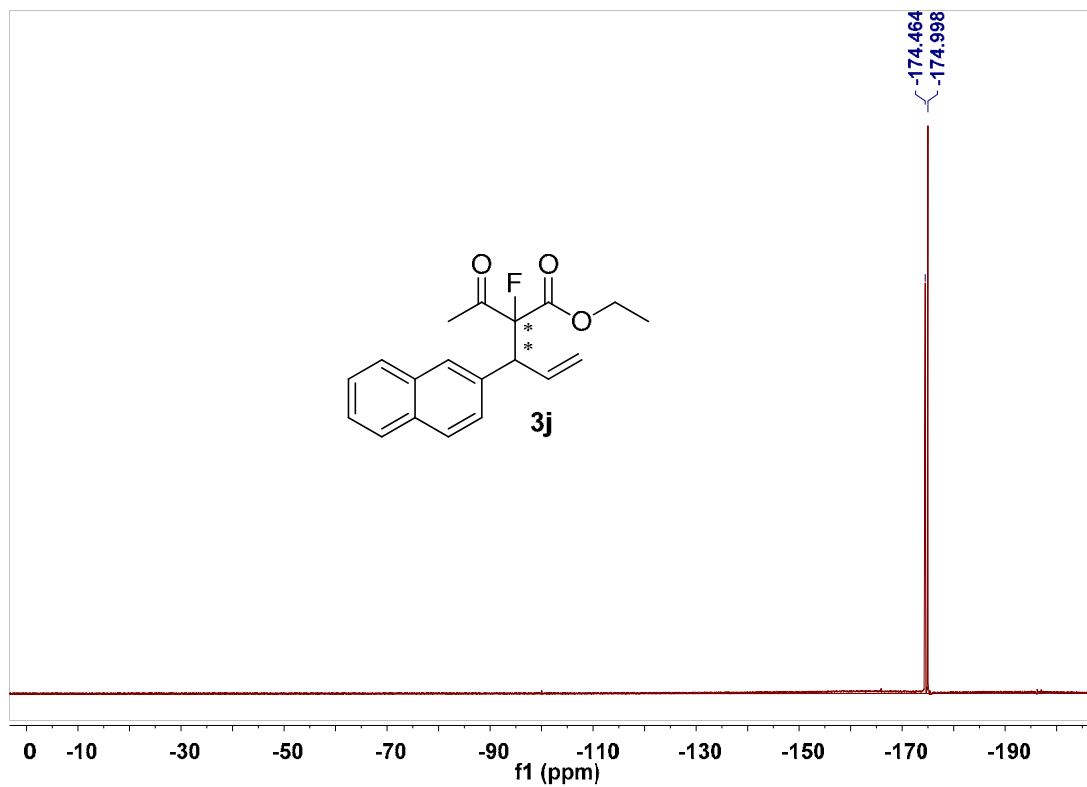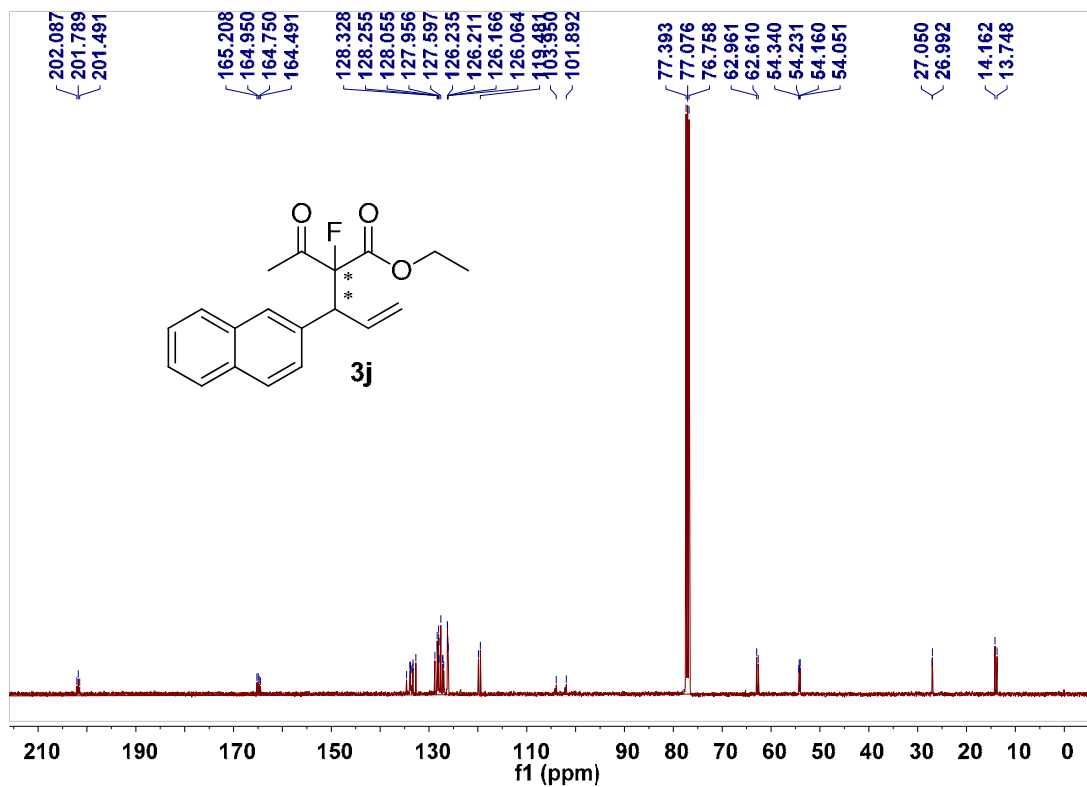

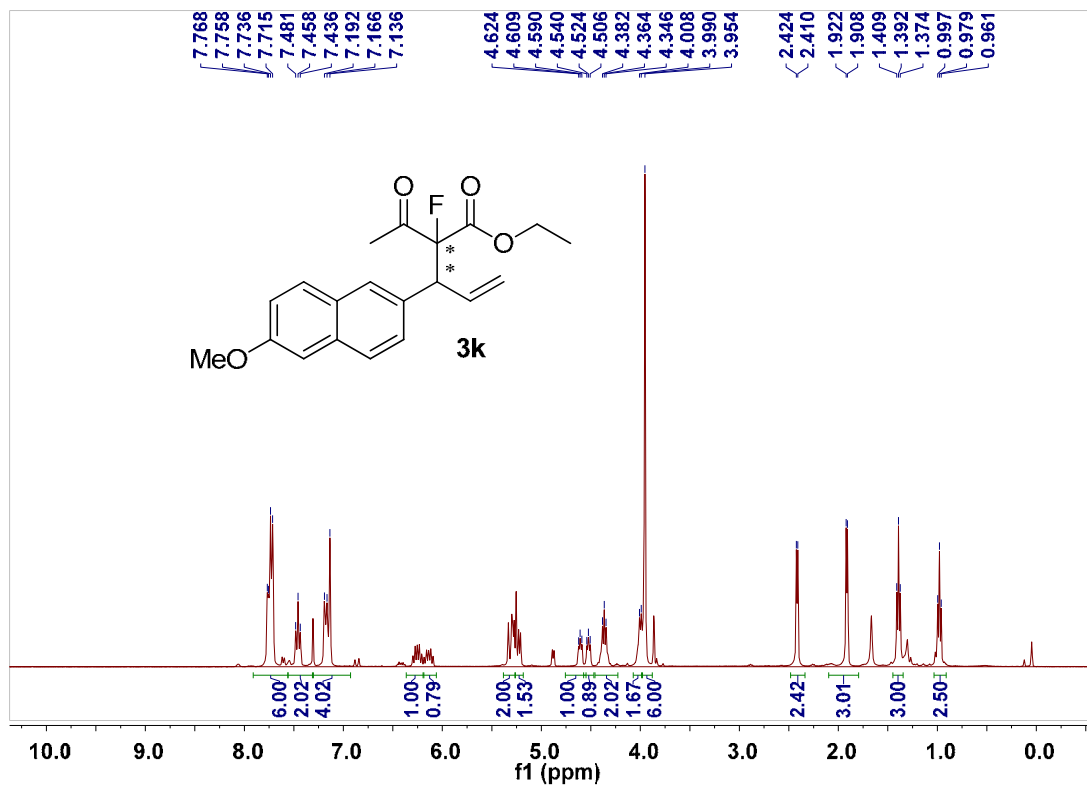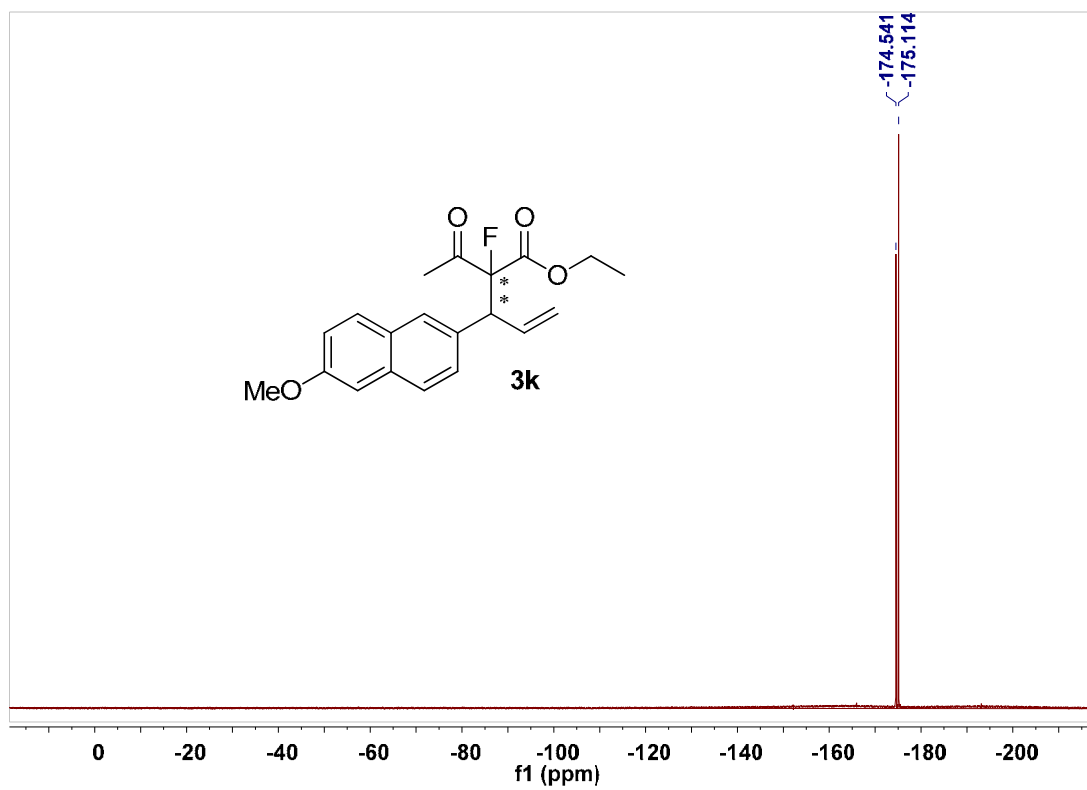

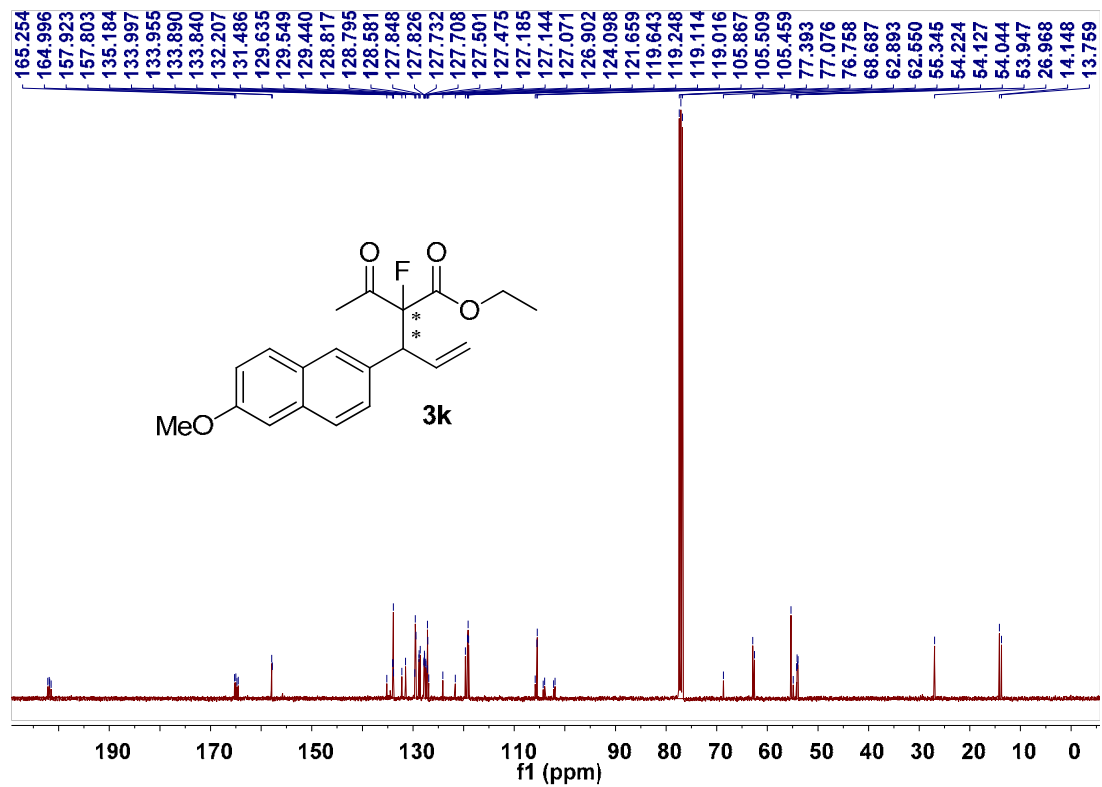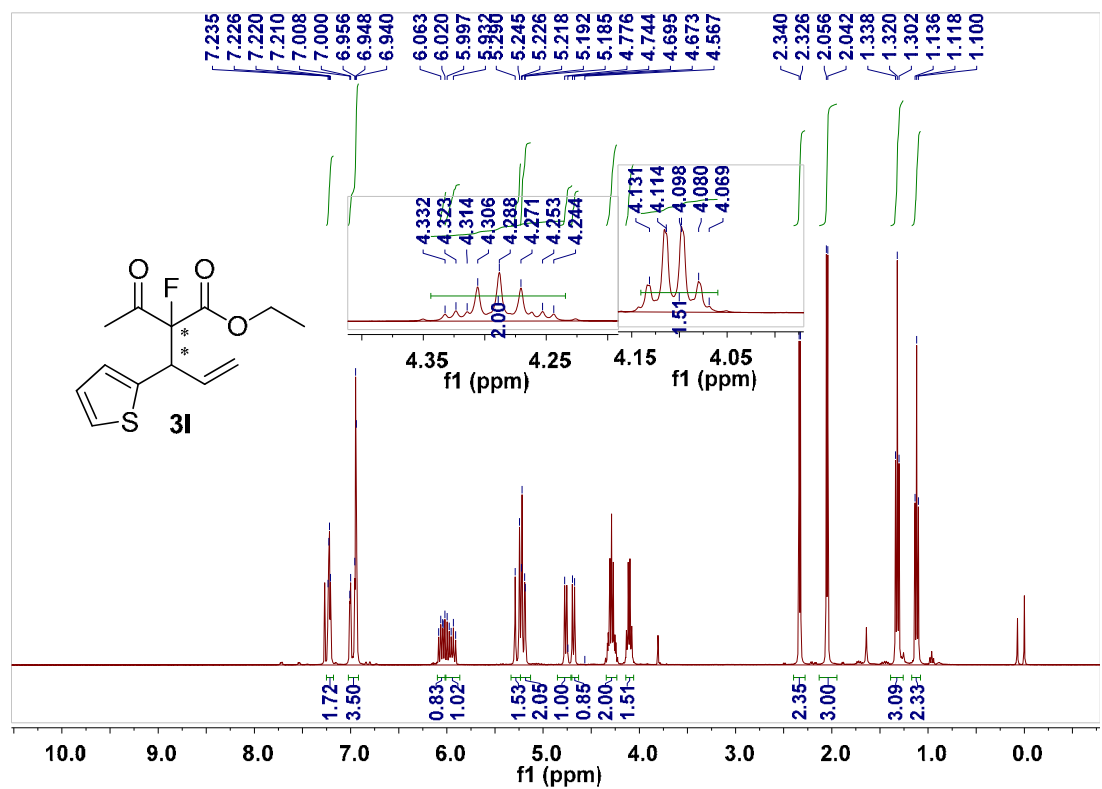

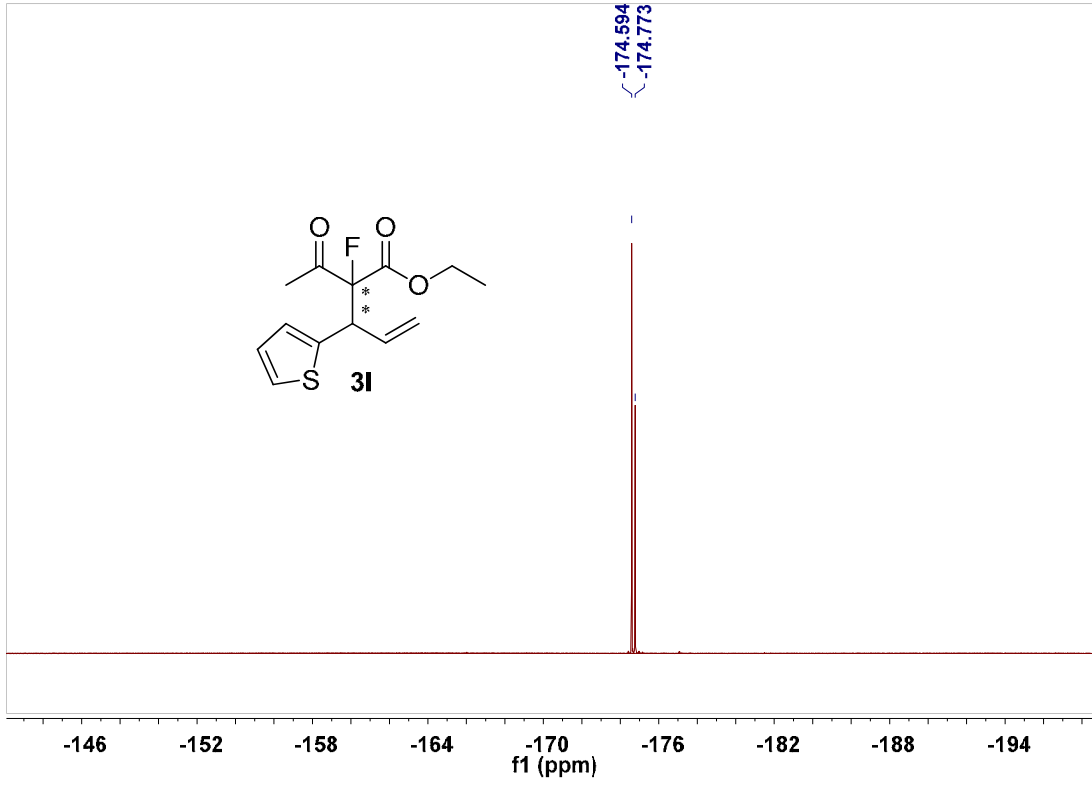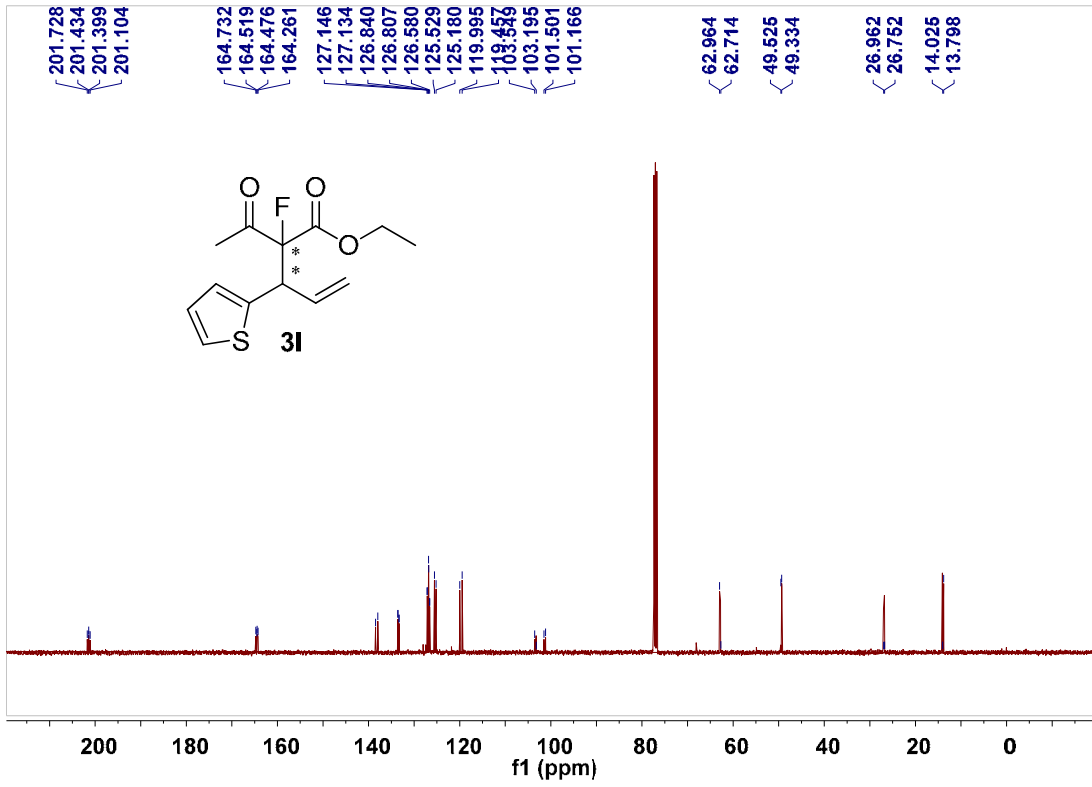

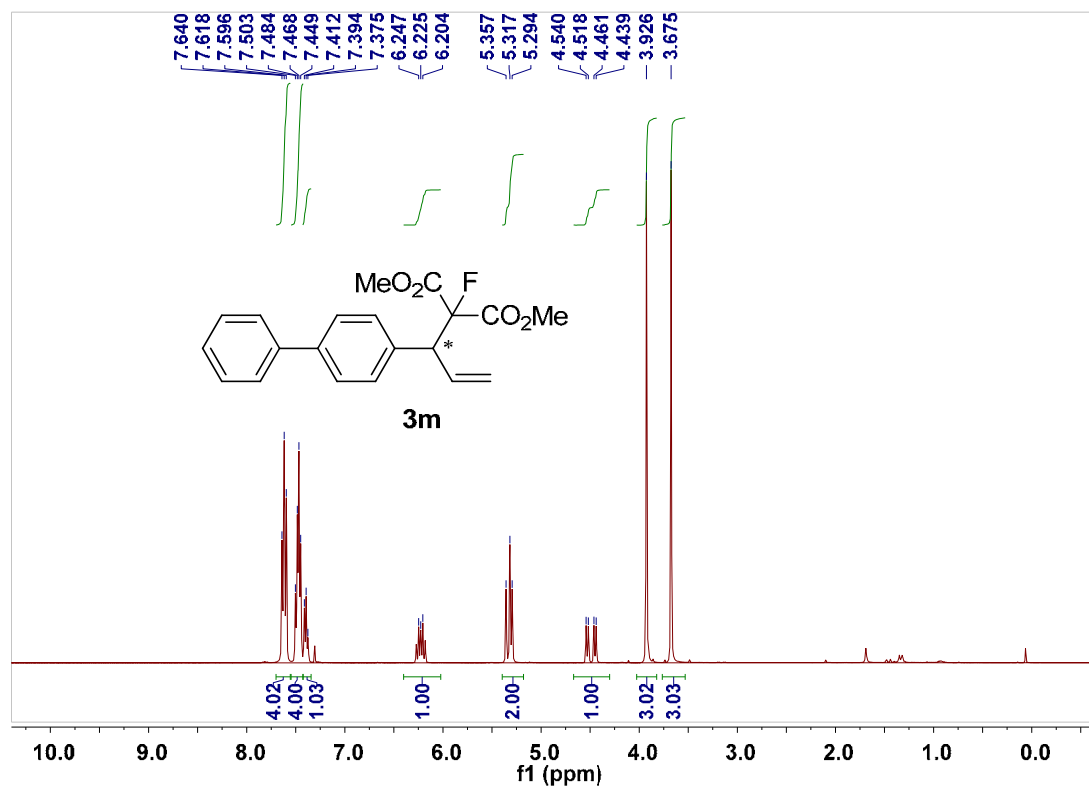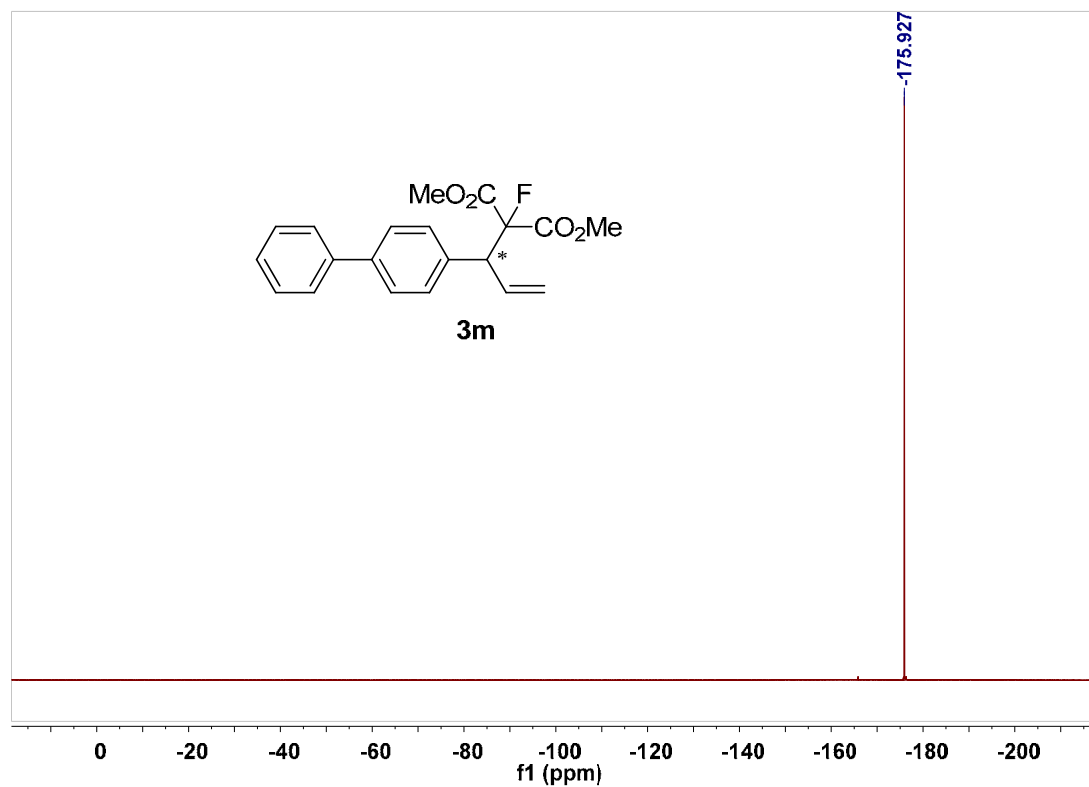

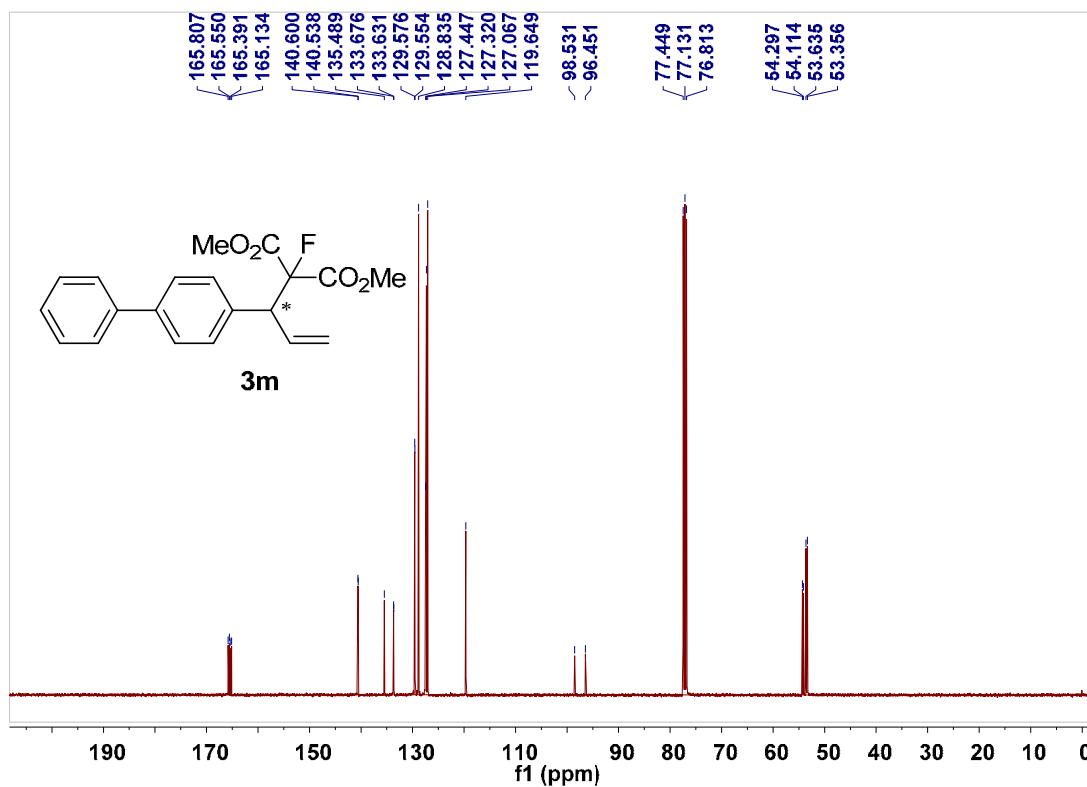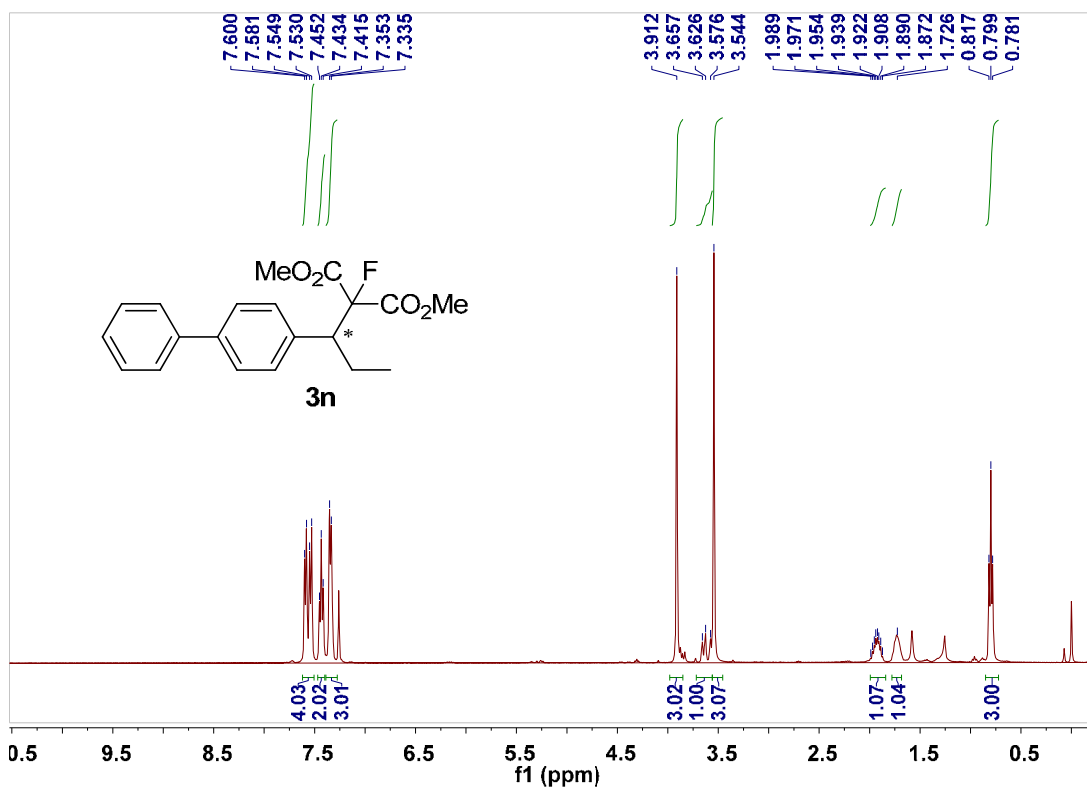

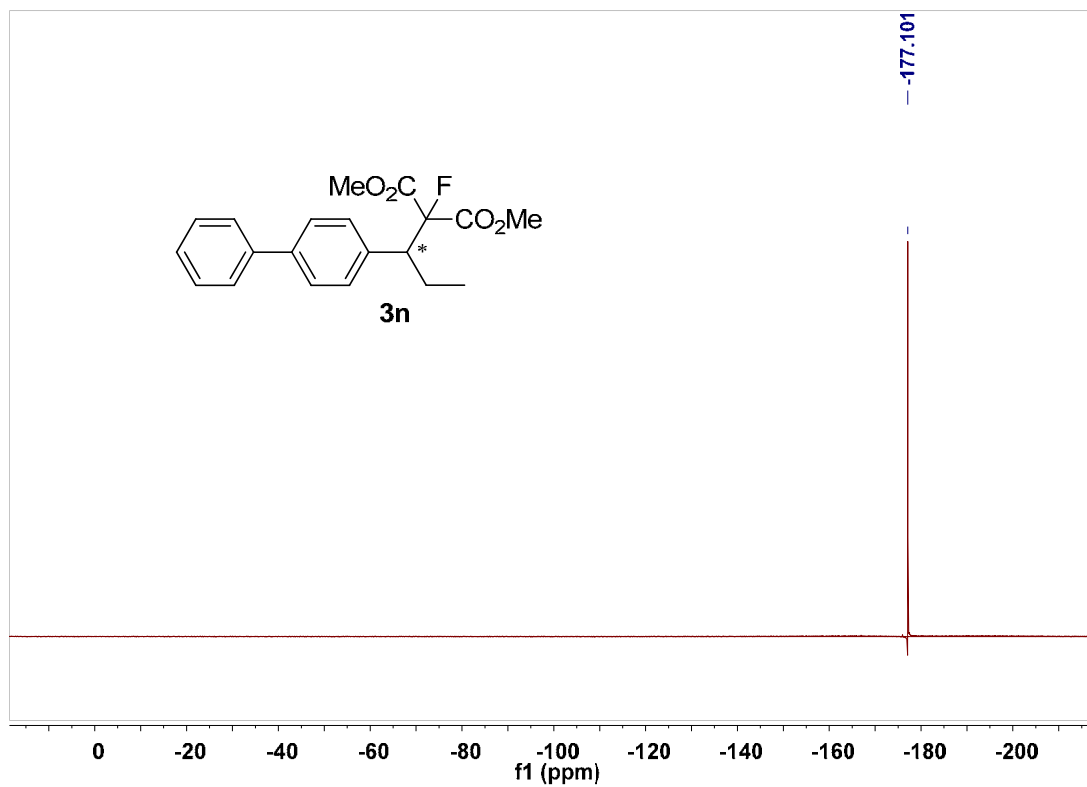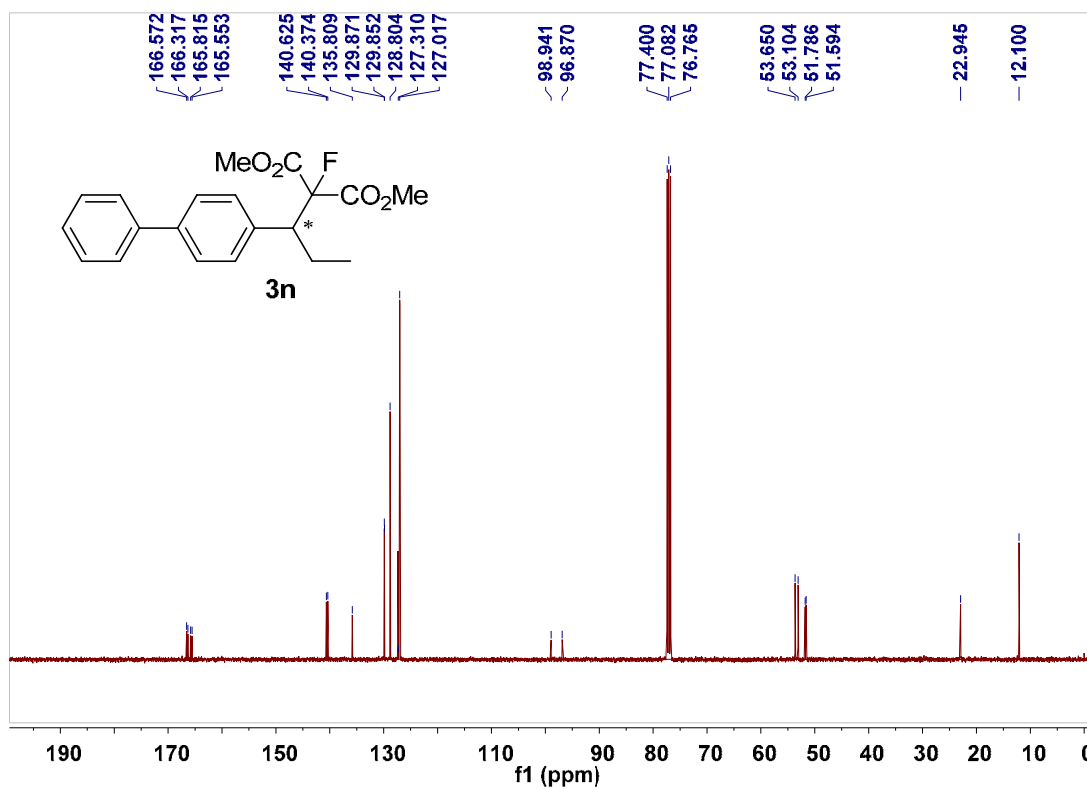



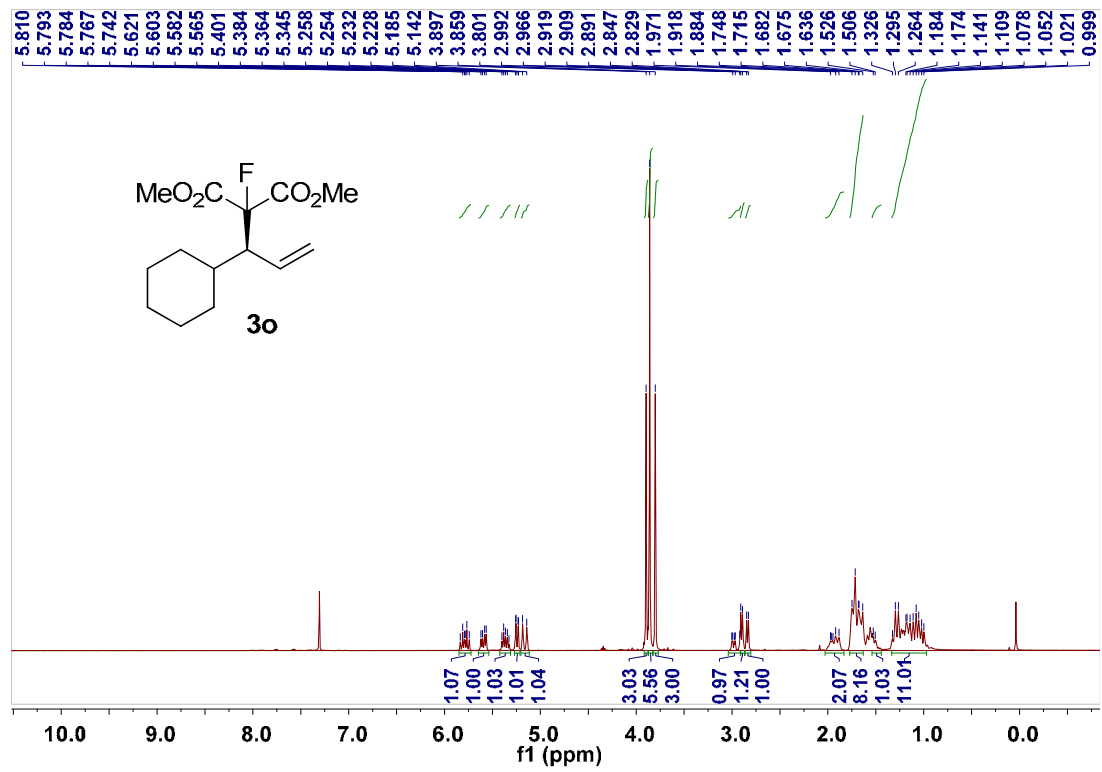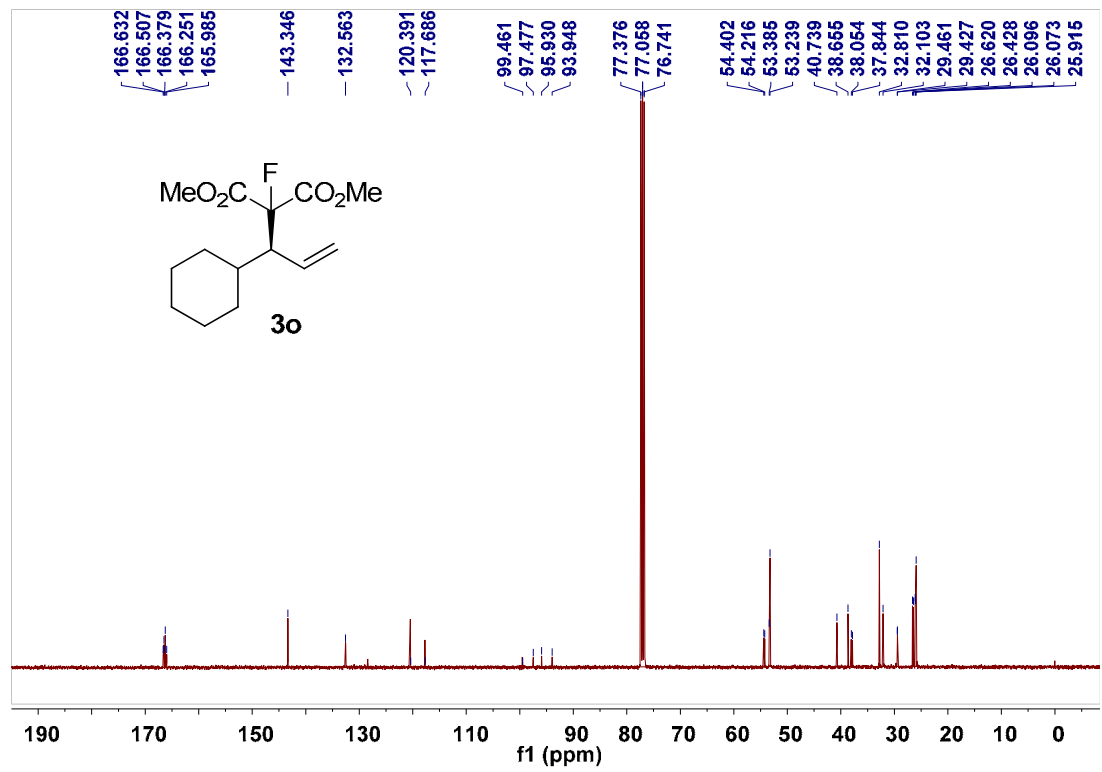

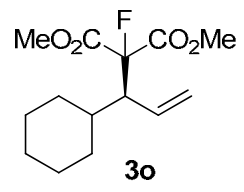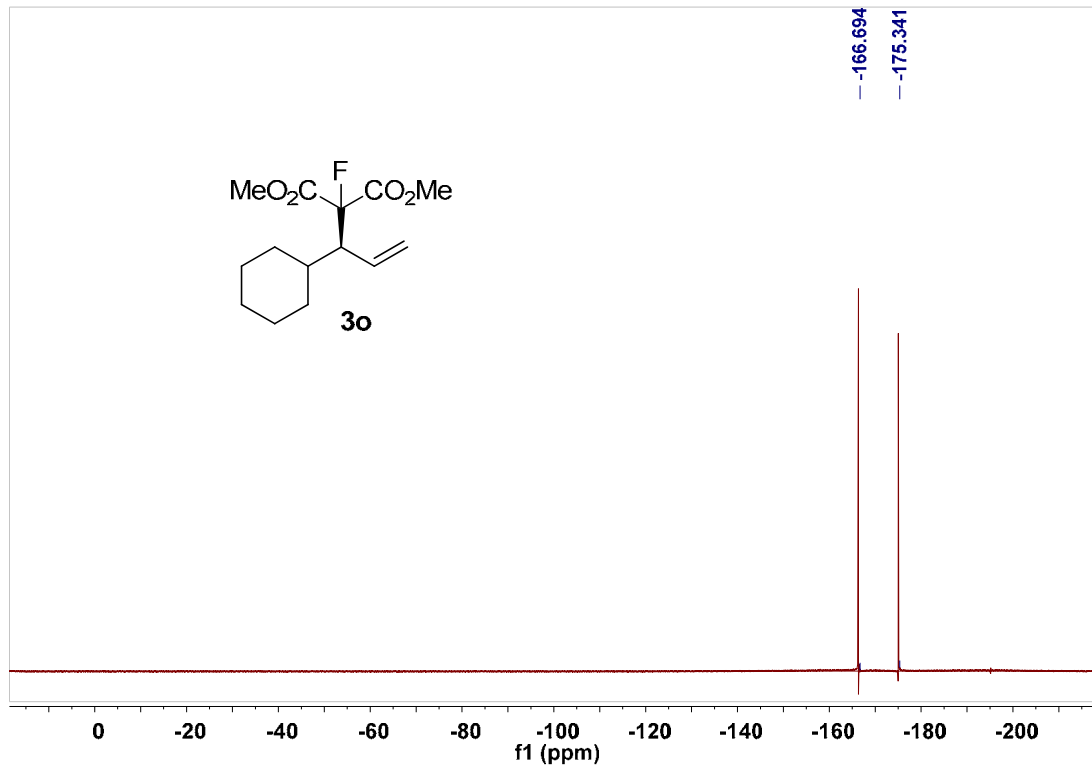

## HPLC Chromatograms

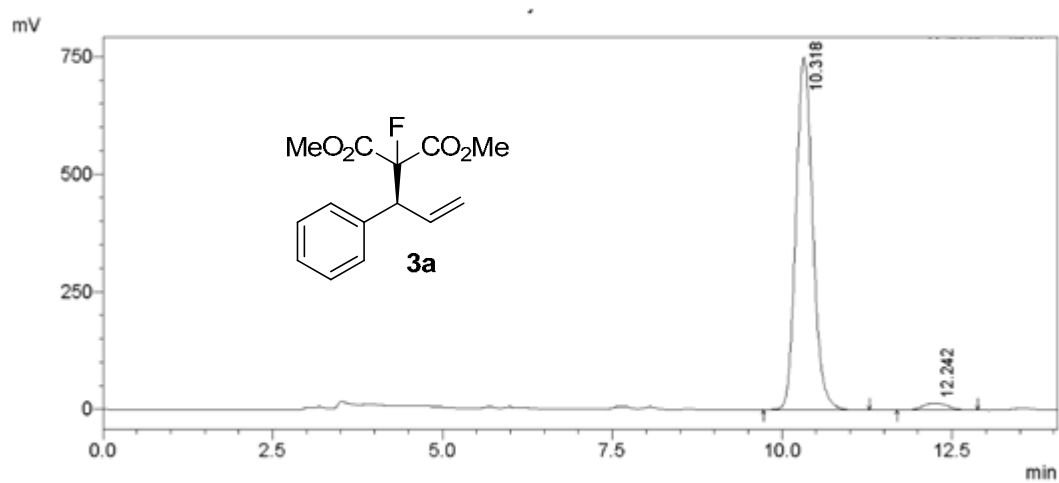

Ch1 214nm

| Peak# | R. Time | Area     | Height | Conc. % |
|-------|---------|----------|--------|---------|
| 1     | 10.318  | 12970501 | 749435 | 97.043  |
| 2     | 12.242  | 395260   | 15271  | 2.957   |

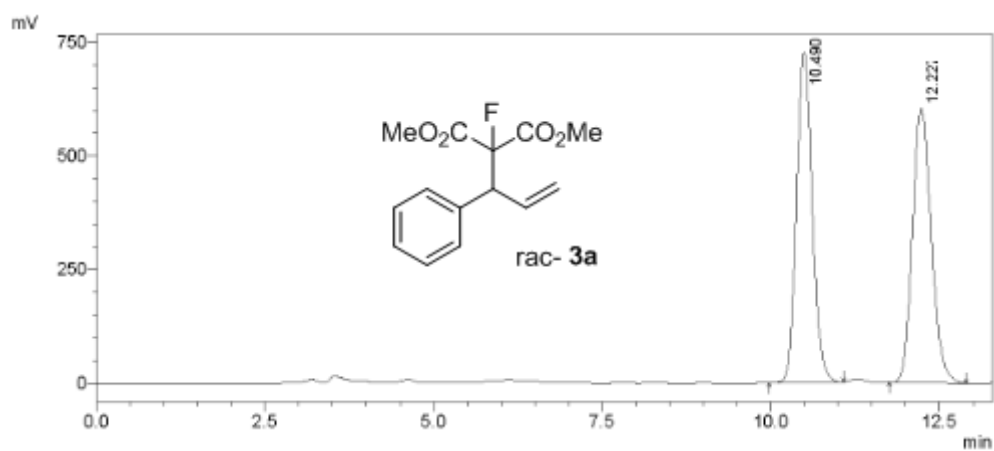

Ch1 214nm

| Peak# | R. Time | Area     | Height | Conc. % |
|-------|---------|----------|--------|---------|
| 1     | 10.490  | 11776167 | 725470 | 50.105  |
| 2     | 12.227  | 11705853 | 603597 | 49.850  |

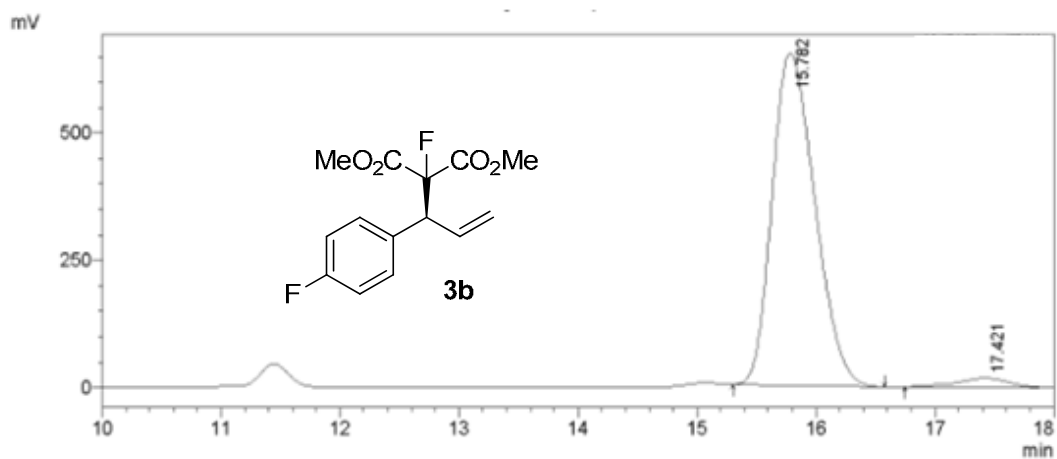

Ch1 214nm

| Peak# | R. Time | Area     | Height | Conc. % |
|-------|---------|----------|--------|---------|
| 1     | 15.782  | 16360447 | 652661 | 96.699  |
| 2     | 17.421  | 558570   | 18357  | 3.301   |

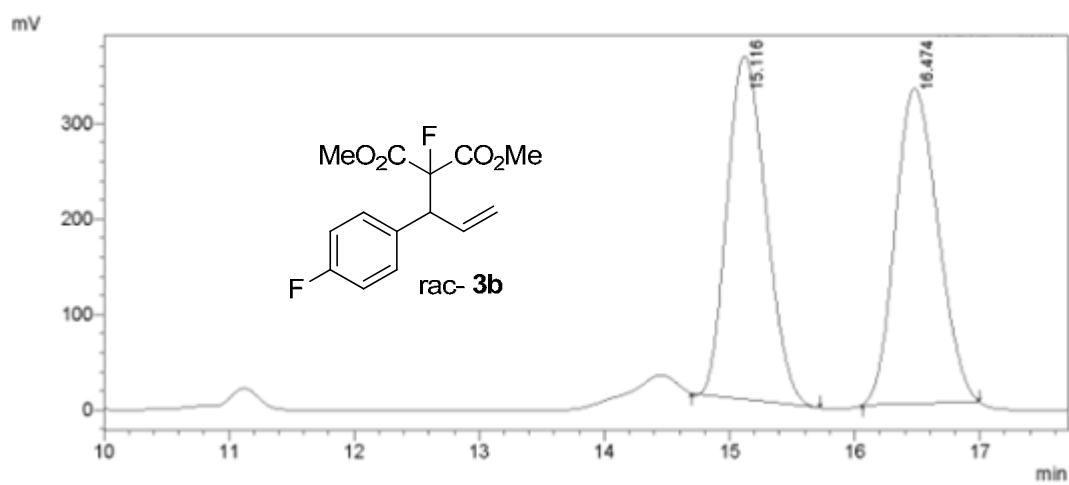

Ch1 214nm

| Peak# | R. Time | Area    | Height | Conc. % |
|-------|---------|---------|--------|---------|
| 1     | 15.116  | 7780474 | 360127 | 49.902  |
| 2     | 16.474  | 7811155 | 329827 | 50.098  |

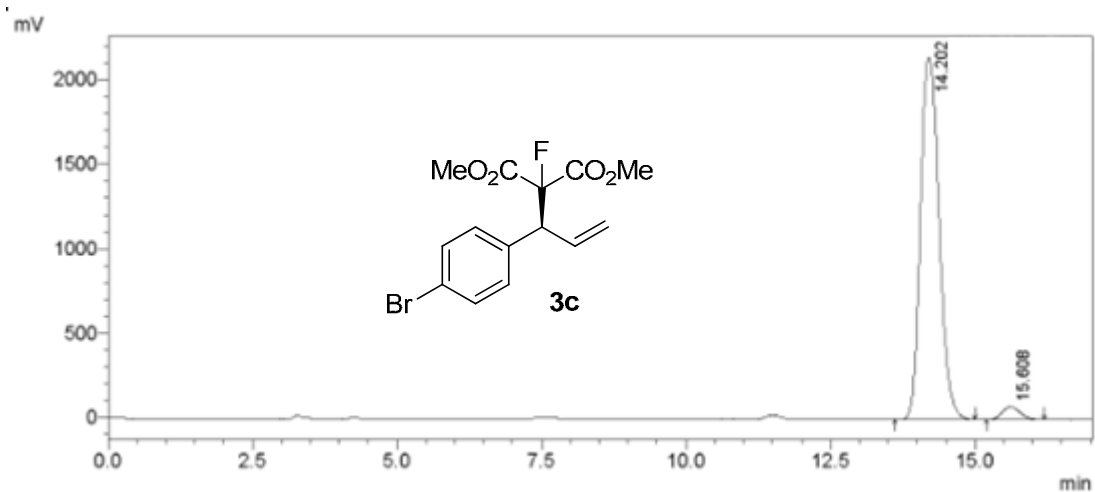

Ch1 214nm

| Peak# | R. Time | Area     | Height  | Conc. % |
|-------|---------|----------|---------|---------|
| 1     | 14.202  | 48134612 | 2142678 | 96.757  |
| 2     | 15.608  | 1613450  | 73823   | 3.243   |

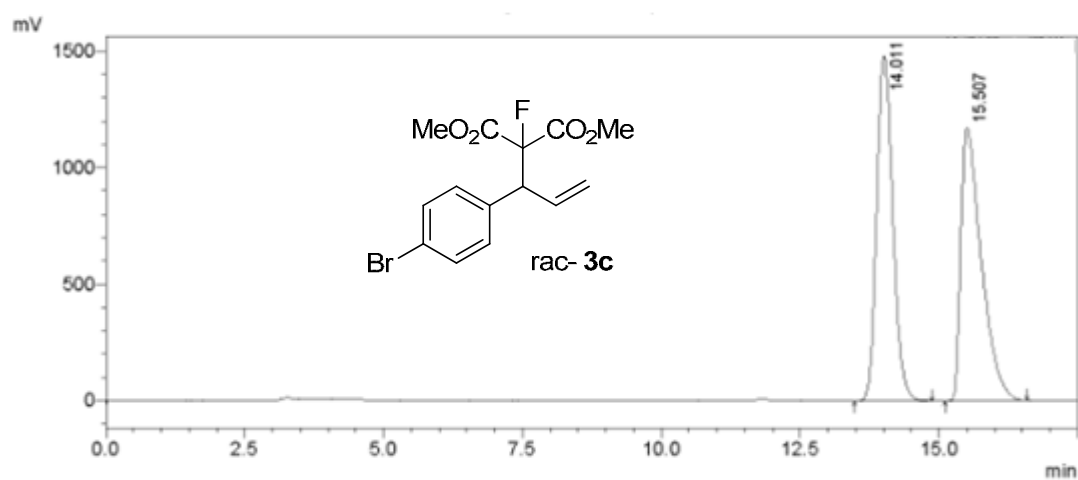

Ch1 214nm

| Peak# | R. Time | Area     | Height  | Conc. % |
|-------|---------|----------|---------|---------|
| 1     | 14.011  | 29860291 | 1479872 | 49.806  |
| 2     | 15.507  | 30093347 | 1172711 | 50.194  |

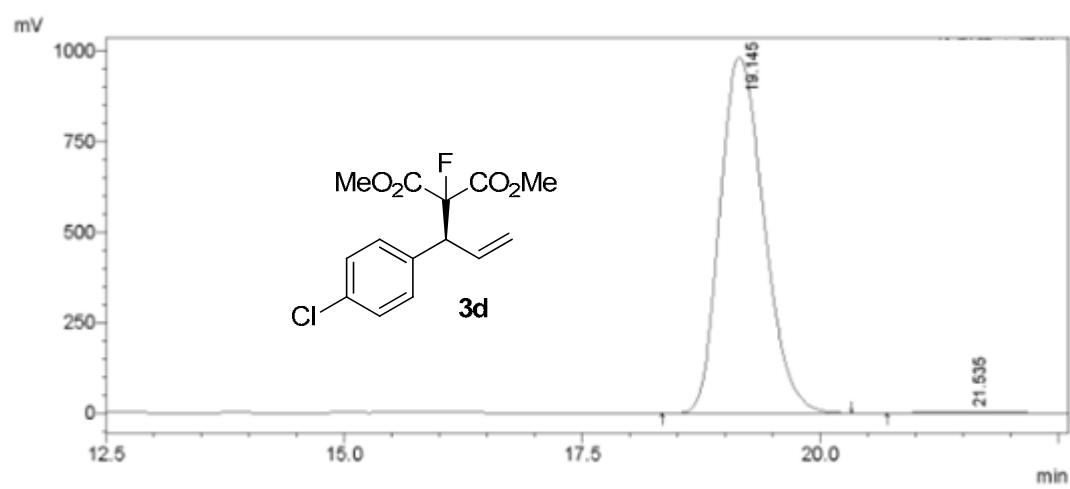

Ch1 214nm

| Peak# | R. Time | Area     | Height | Conc. % |
|-------|---------|----------|--------|---------|
| 1     | 19.145  | 31667120 | 984485 | 99.461  |
| 2     | 21.535  | 171575   | 2345   | 0.539   |

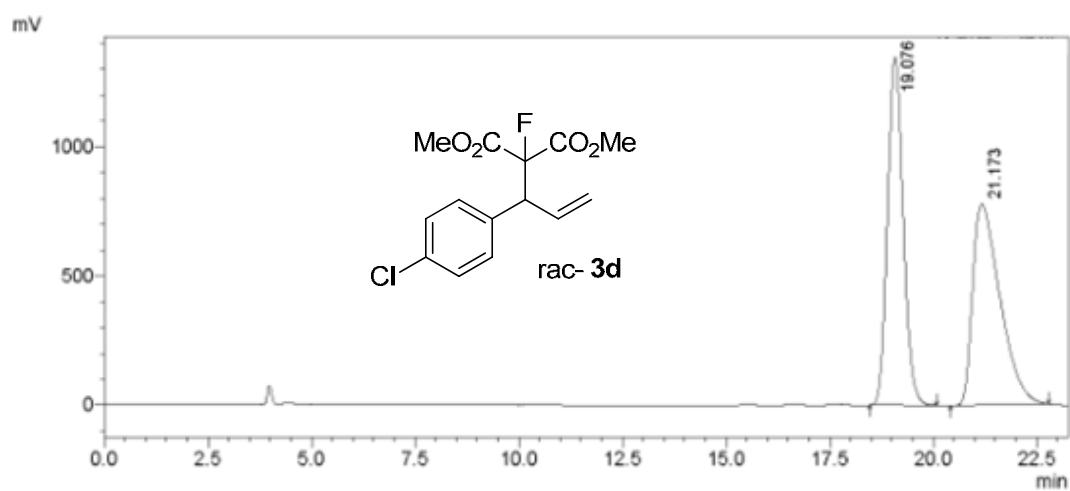

Ch1 214nm

| Peak# | R. Time | Area     | Height  | Conc. % |
|-------|---------|----------|---------|---------|
| 1     | 19.076  | 35621066 | 1347997 | 49.841  |
| 2     | 21.173  | 35848438 | 777962  | 50.159  |

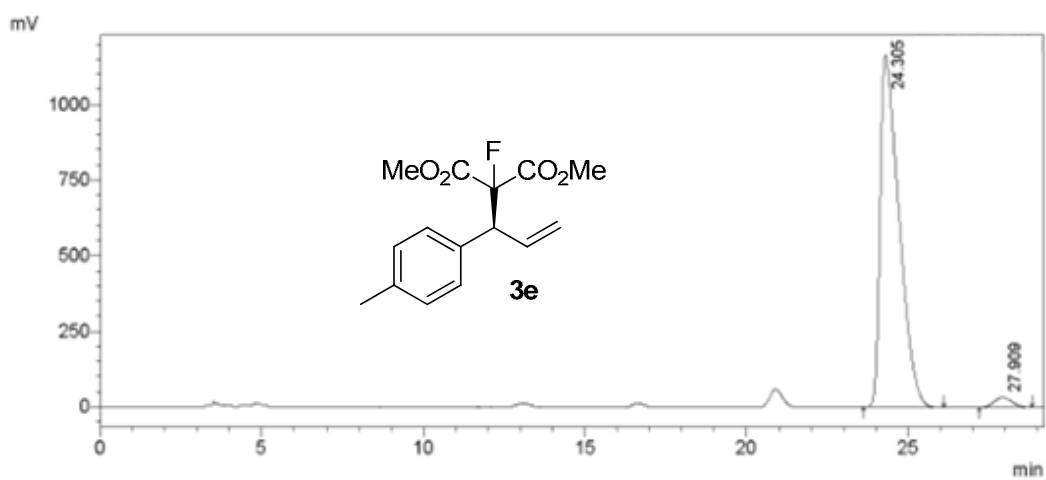

Ch1 214nm

| Peak# | R. Time | Area     | Height  | Conc. % |
|-------|---------|----------|---------|---------|
| 1     | 24.305  | 47342334 | 1163607 | 97.342  |
| 2     | 27.909  | 1292957  | 32661   | 2.658   |

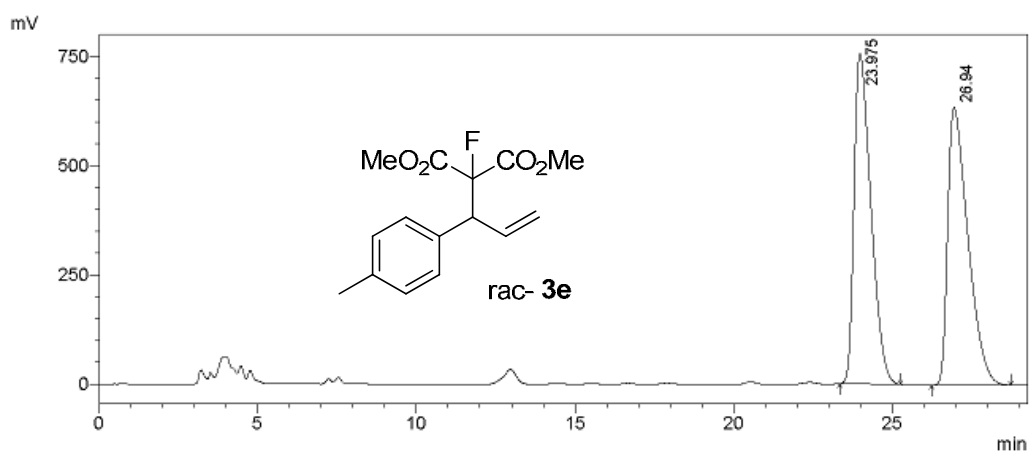

Ch1 214nm

| Peak# | R. Time | Area     | Height | Conc. % |
|-------|---------|----------|--------|---------|
| 1     | 23.975  | 28025582 | 756879 | 49.805  |
| 2     | 26.940  | 28244976 | 635059 | 50.195  |

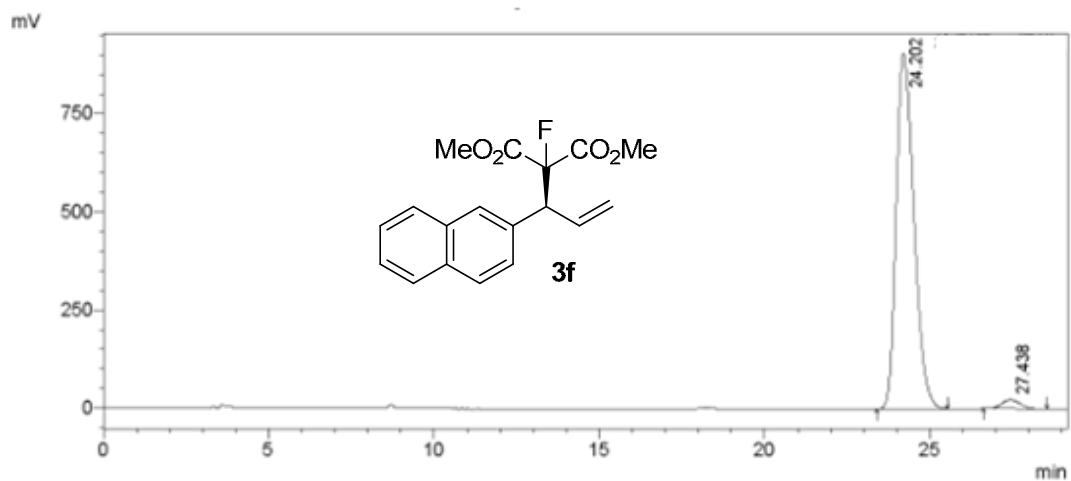

Ch1 214nm

| Peak# | R. Time | Area     | Height | Conc. % |
|-------|---------|----------|--------|---------|
| 1     | 24.202  | 33682492 | 905293 | 97.442  |
| 2     | 27.438  | 884200   | 22033  | 2.558   |

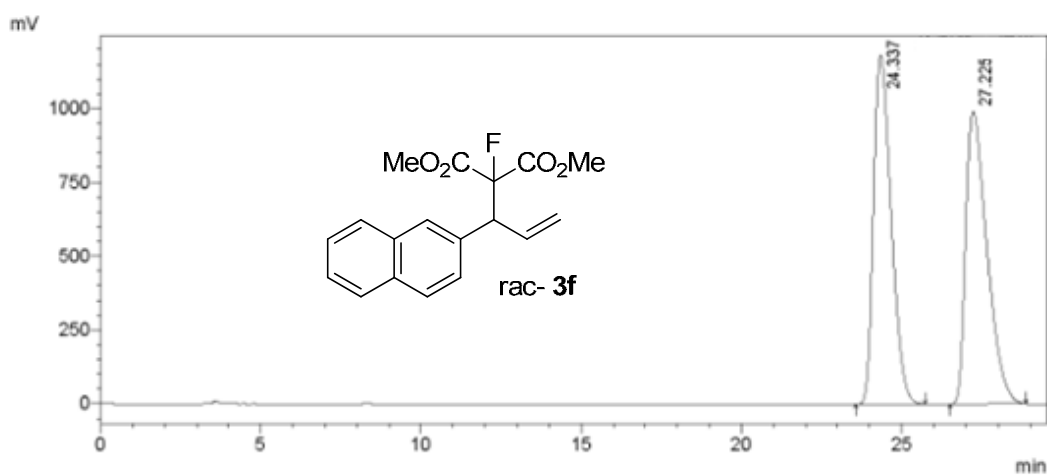

Ch1 214nm

| Peak# | R. Time | Area     | Height  | Conc. % |
|-------|---------|----------|---------|---------|
| 1     | 24.337  | 45262317 | 1182744 | 49.716  |
| 2     | 27.225  | 45780089 | 991612  | 50.284  |



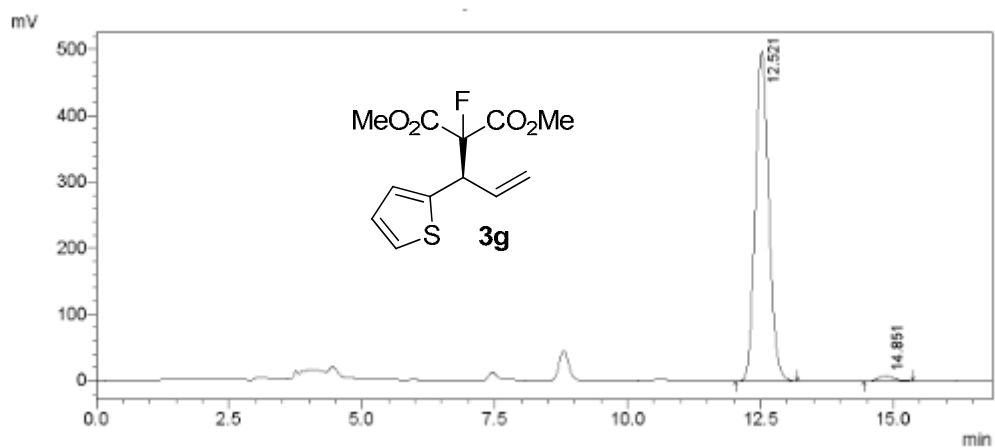

Ch1 214nm

| Peak# | R. Time | Area    | Height | Conc. % |
|-------|---------|---------|--------|---------|
| 1     | 12.521  | 8822697 | 497808 | 98.212  |
| 2     | 14.851  | 160576  | 7981   | 1.788   |

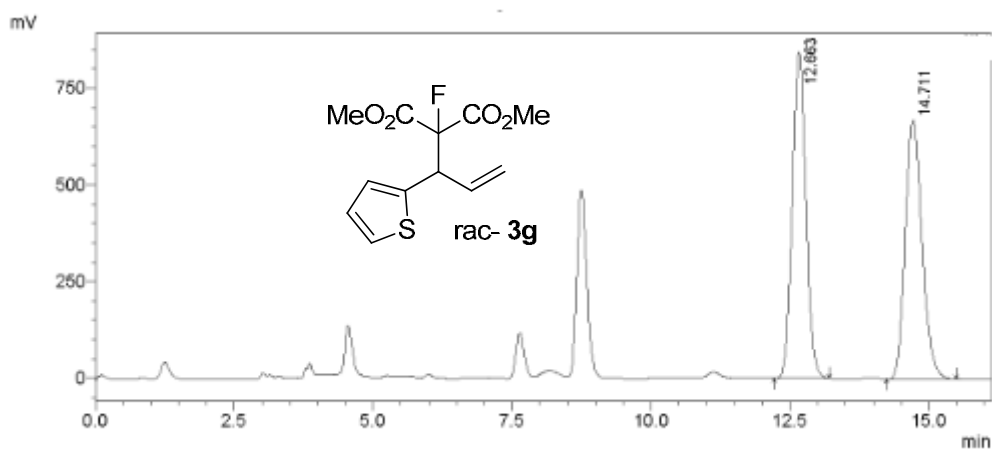

Ch1 214nm

| Peak# | R. Time | Area     | Height | Conc. % |
|-------|---------|----------|--------|---------|
| 1     | 12.663  | 14423893 | 843322 | 50.456  |
| 2     | 14.711  | 14163163 | 668975 | 49.544  |

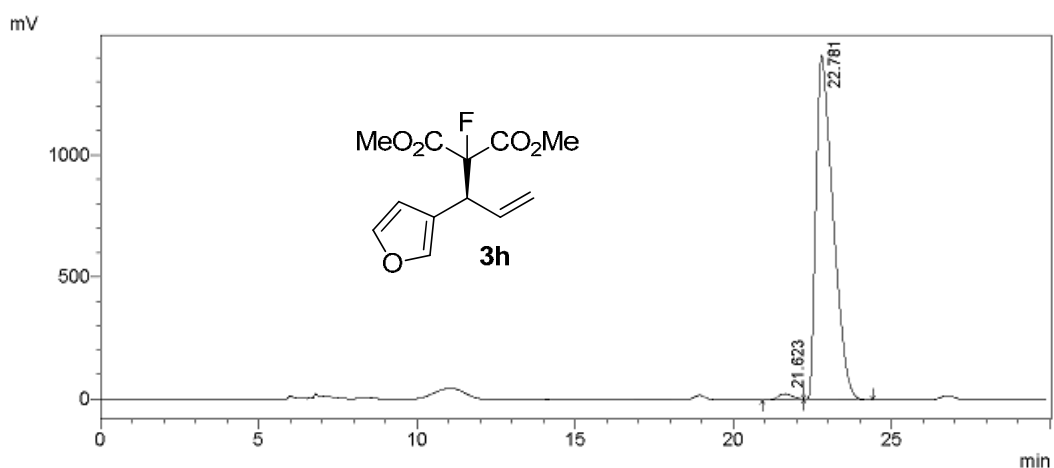

Ch1 214nm

| Peak# | R. Time | Area     | Height  | Conc. % |
|-------|---------|----------|---------|---------|
| 1     | 21.623  | 671940   | 22728   | 1.258   |
| 2     | 22.781  | 52724333 | 1411503 | 98.742  |

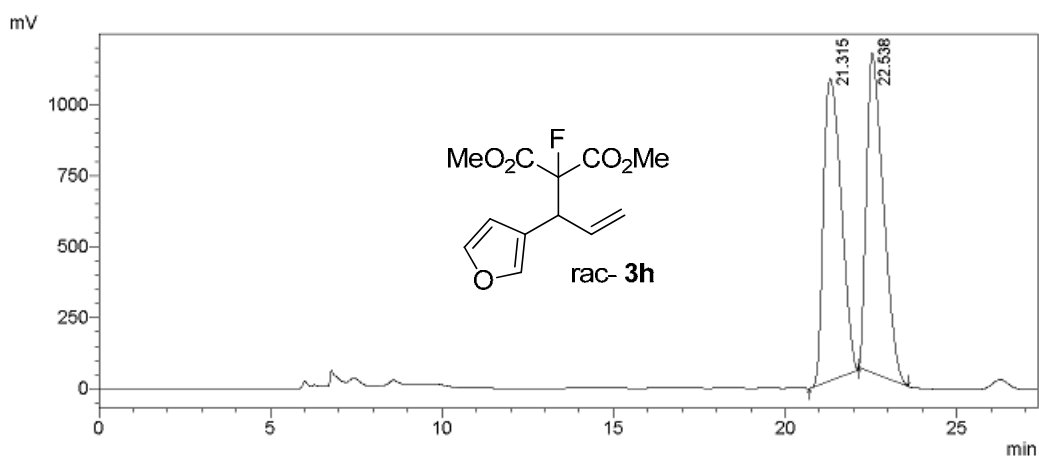

Ch1 214nm

| Peak# | R. Time | Area     | Height  | Conc. % |
|-------|---------|----------|---------|---------|
| 1     | 21.315  | 38158357 | 1061215 | 49.750  |
| 2     | 22.538  | 38542423 | 1124241 | 50.250  |

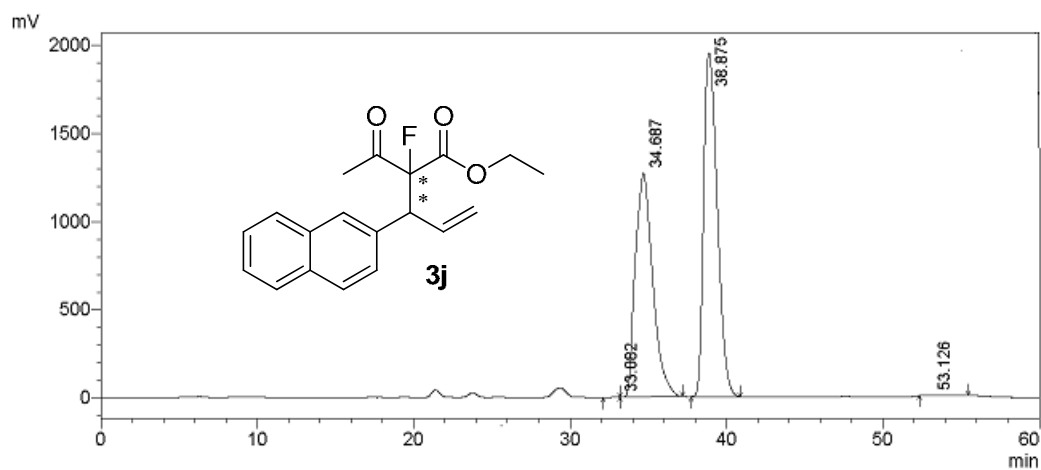

Ch1 214nm

| Peak# | R. Time | Area      | Height  | Conc. % |
|-------|---------|-----------|---------|---------|
| 1     | 33.082  | 22350     | 494     | 0.010   |
| 2     | 34.678  | 98216151  | 1270026 | 45.286  |
| 3     | 38.875  | 118263979 | 1950756 | 54.530  |
| 4     | 53.126  | 375097    | 3656    | 0.173   |

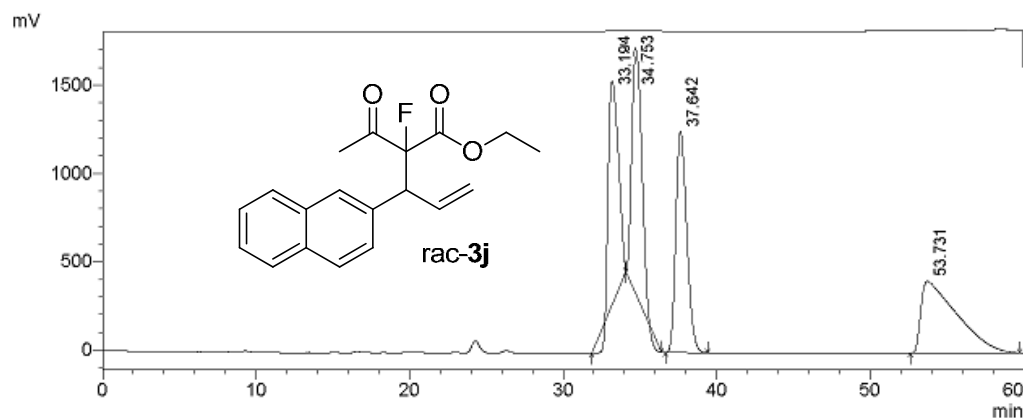

Ch1 214nm

| Peak# | R. Time | Area     | Height  | Conc. % |
|-------|---------|----------|---------|---------|
| 1     | 33.194  | 54083459 | 1267234 | 22.225  |
| 2     | 34.753  | 60635969 | 1385036 | 24.918  |
| 3     | 37.642  | 62403091 | 1252026 | 25.644  |
| 4     | 53.731  | 66223842 | 405953  | 27.214  |

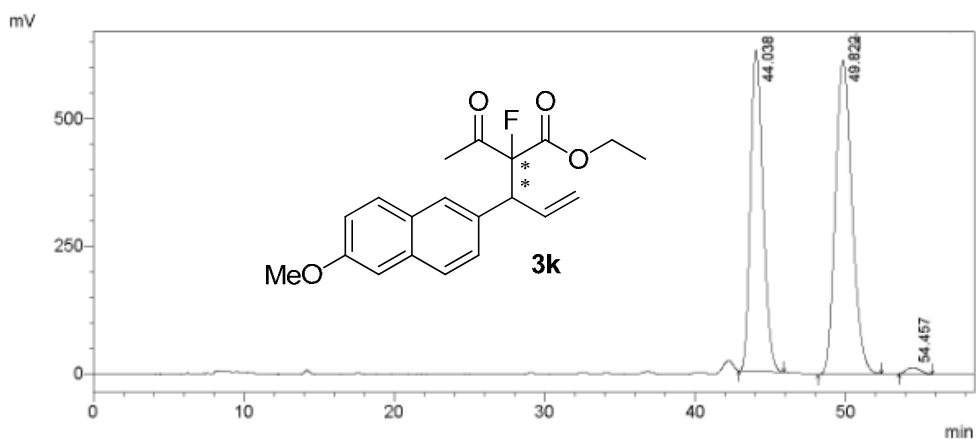

Ch1 214nm

| Peak# | R. Time | Area     | Height | Conc. % |
|-------|---------|----------|--------|---------|
| 1     | 44.038  | 36538365 | 630472 | 43.054  |
| 2     | 49.822  | 47522463 | 615931 | 55.997  |
| 3     | 54.457  | 805627   | 12648  | 0.949   |

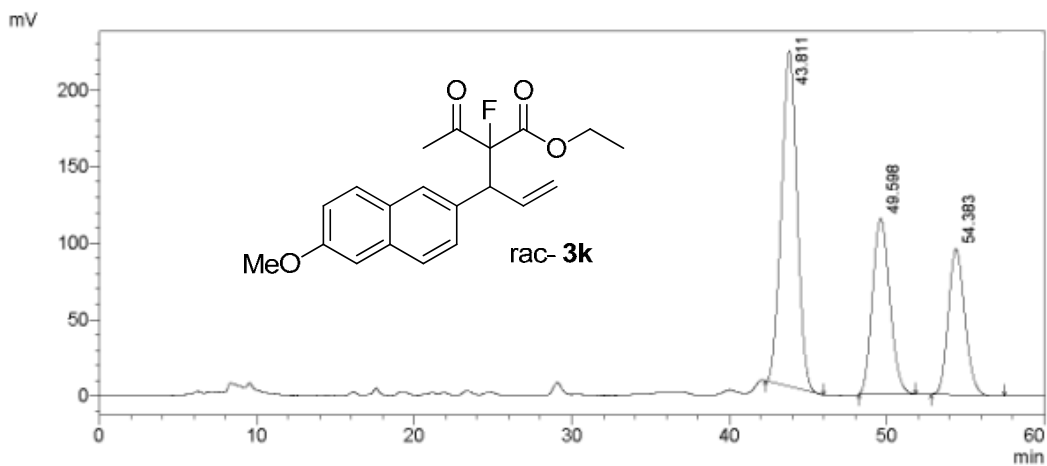

Ch1 214nm

| Peak# | R. Time | Area     | Height | Conc. % |
|-------|---------|----------|--------|---------|
| 1     | 43.831  | 15206886 | 219402 | 49.122  |
| 2     | 49.598  | 8805885  | 114936 | 28.445  |
| 3     | 54.383  | 6944676  | 95340  | 22.433  |

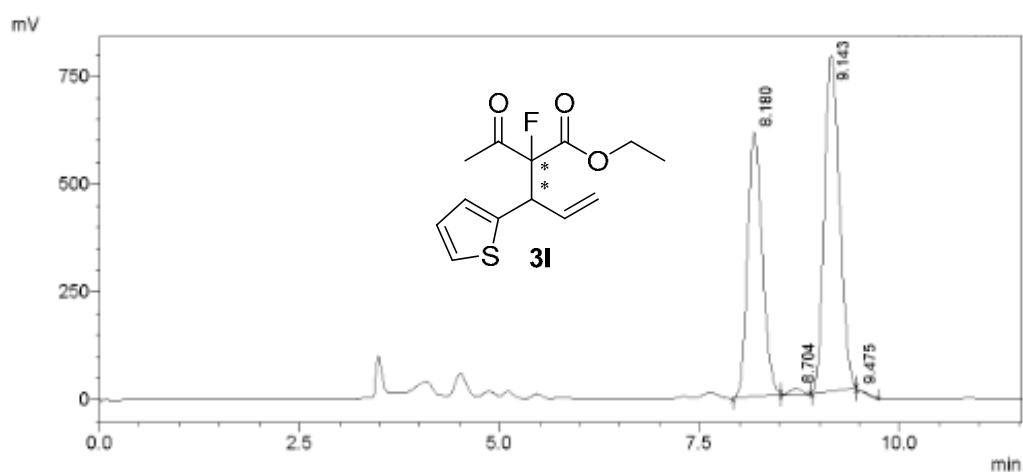

Ch1 214nm

| Peak# | R. Time | Area     | Height | Conc. % |
|-------|---------|----------|--------|---------|
| 1     | 8.180   | 7830823  | 611273 | 42.625  |
| 2     | 8.704   | 171628   | 15142  | 0.934   |
| 3     | 9.143   | 10325205 | 776565 | 55.288  |
| 4     | 9.475   | 43821    | 1600   | 0.114   |

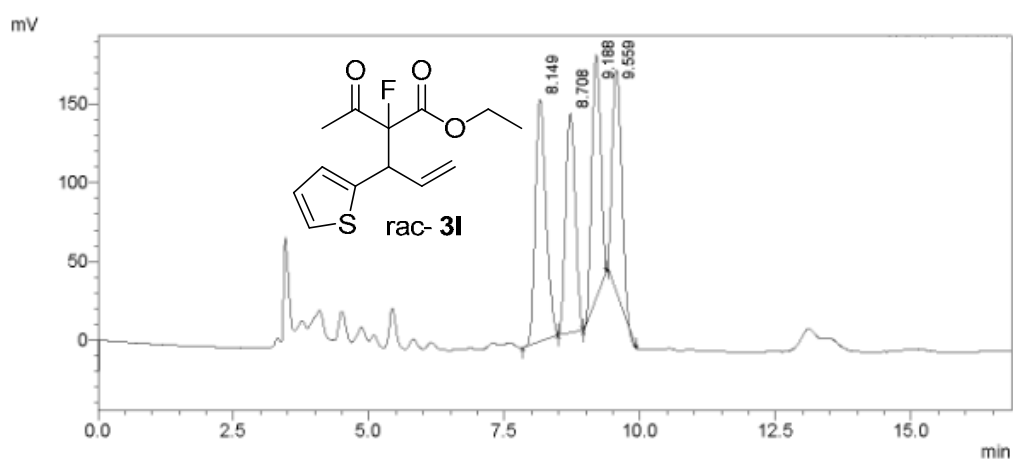

Ch1 214nm

| Peak# | R. Time | Area    | Height | Conc. % |
|-------|---------|---------|--------|---------|
| 1     | 8.149   | 2090261 | 153912 | 28.719  |
| 2     | 8.708   | 1729275 | 139716 | 23.759  |
| 3     | 9.188   | 1787302 | 155507 | 24.557  |
| 4     | 9.559   | 1671461 | 141074 | 22.965  |

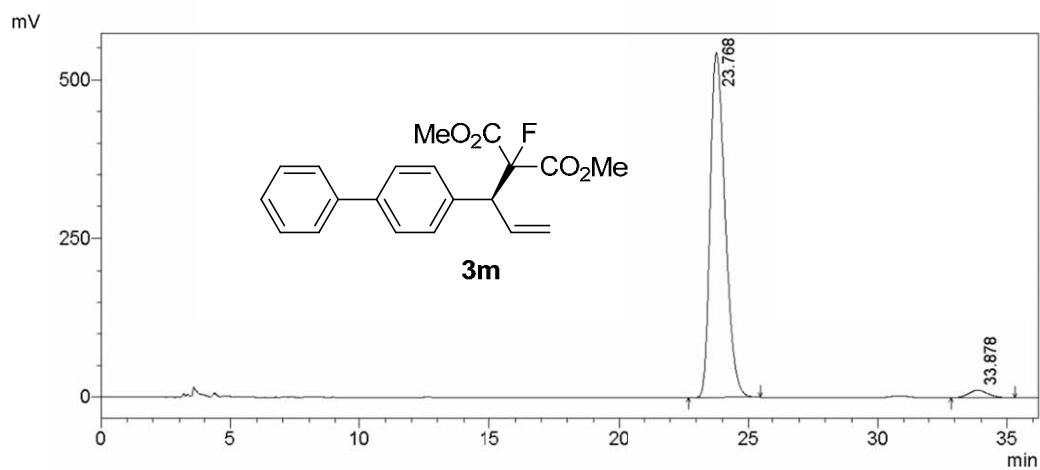

Ch1 214nm

| Peak# | R. Time | Area     | Height | Conc. % |
|-------|---------|----------|--------|---------|
| 1     | 23.768  | 21584935 | 542634 | 97.197  |
| 2     | 33.878  | 622432   | 11905  | 2.803   |

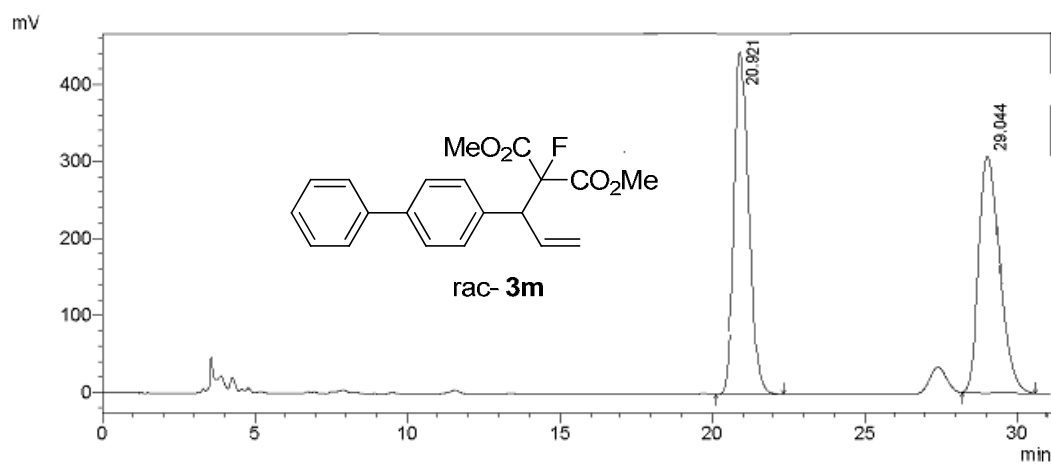

Ch1 214nm

| Peak# | R. Time | Area     | Height | Conc. % |
|-------|---------|----------|--------|---------|
| 1     | 20.921  | 15019985 | 442185 | 50.505  |
| 2     | 29.044  | 14719329 | 305823 | 49.495  |

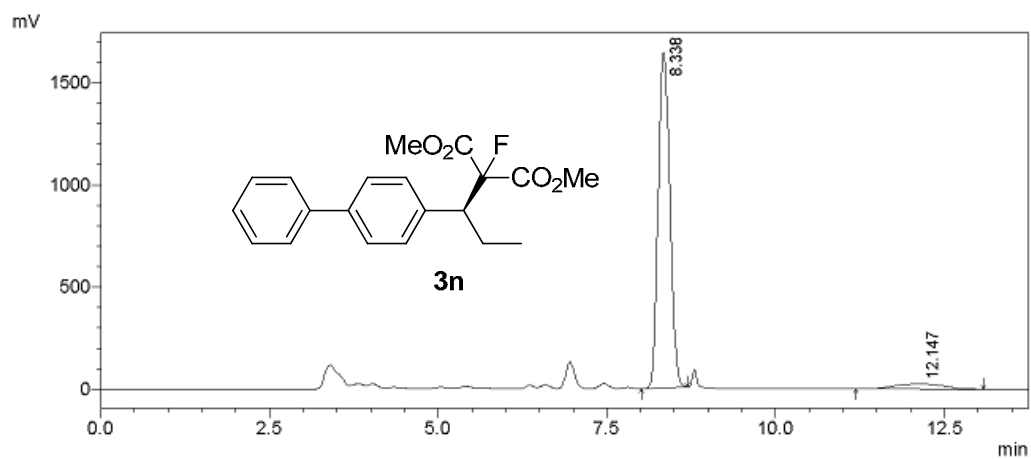

Ch1 214nm

| Peak# | R. Time | Area     | Height  | Conc.% |
|-------|---------|----------|---------|--------|
| 1     | 8.338   | 19909783 | 1644479 | 94.421 |
| 2     | 12.147  | 1176435  | 23751   | 5.579  |

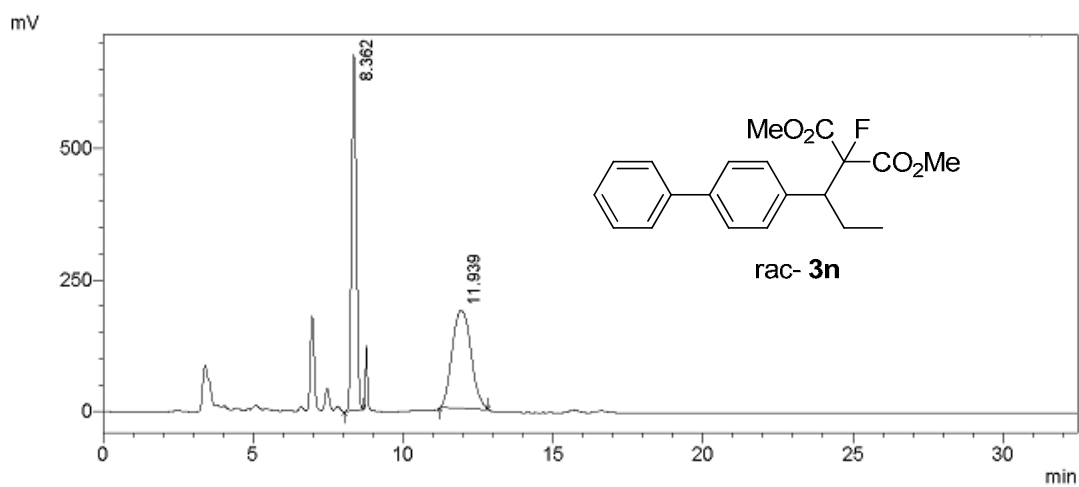

Ch1 214nm

| Peak# | R. Time | Area    | Height | Conc.% |
|-------|---------|---------|--------|--------|
| 1     | 8.362   | 7492305 | 674844 | 47.851 |
| 2     | 11.939  | 8165347 | 186148 | 52.149 |

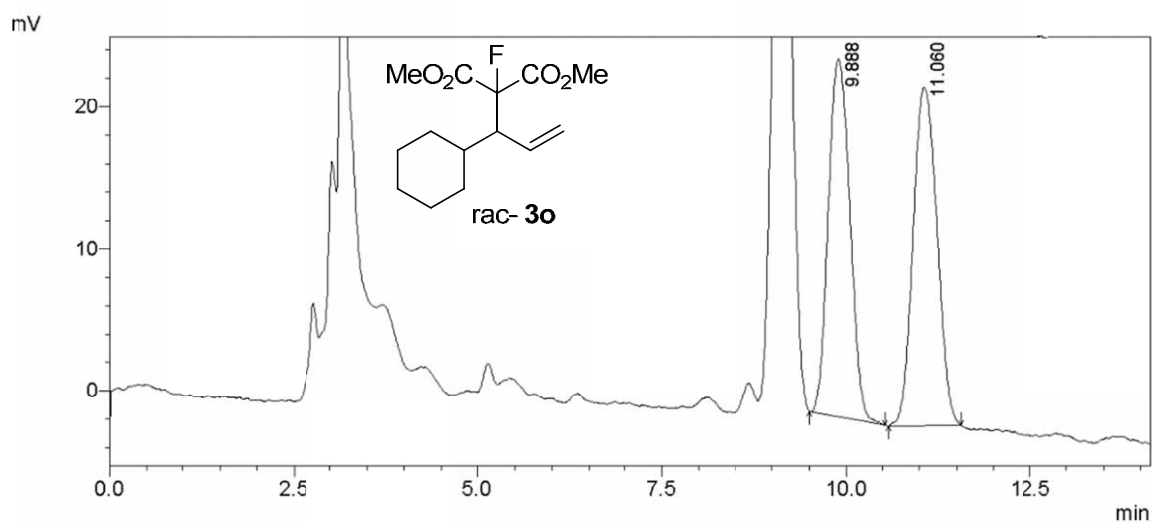

| Peak# | R. Time | Area   | Height | Conc. % |
|-------|---------|--------|--------|---------|
| 1     | 9.888   | 504680 | 25179  | 48.622  |
| 2     | 11.060  | 533294 | 23850  | 51.378  |

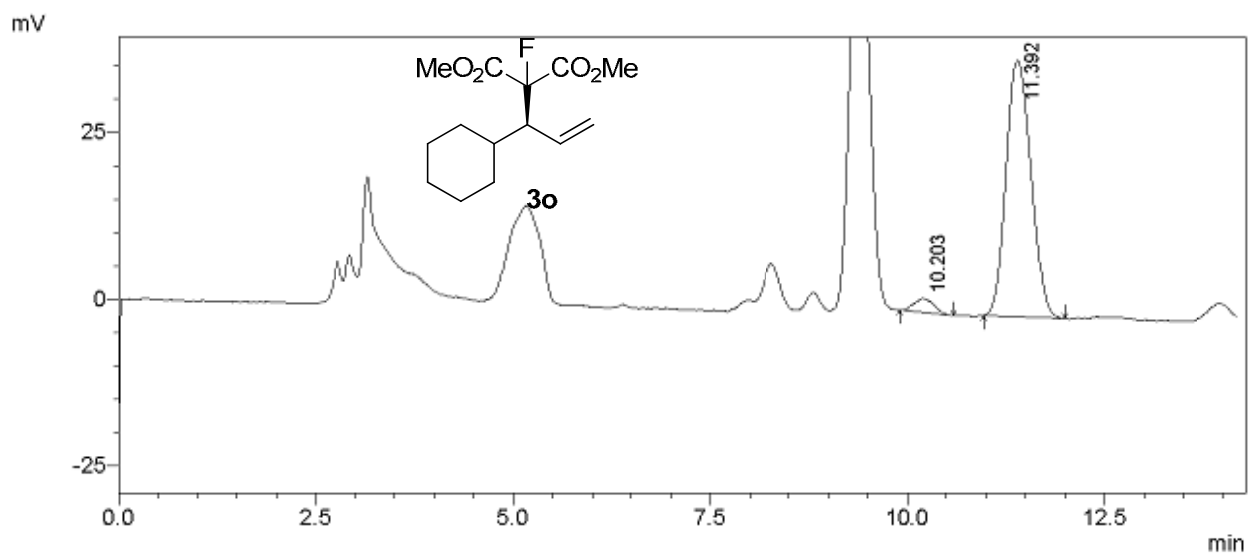

| Peak# | R. Time | Area   | Height | Conc. % |
|-------|---------|--------|--------|---------|
| 1     | 10.203  | 37094  | 2073   | 4.240   |
| 2     | 11.392  | 837697 | 38408  | 95.760  |
